# Supplementary material for: Solvent free, phosphine free Pd-catalyzed annulations of aryl bromides with diarylacetylenes
Source: Royal Society of Chemistry journal article supplement (doi:10.1039/c3ra41924j), 2013-01-01
Supplement: c3ra41924j.pdf [file c3ra41924j.pdf]

# Solvent free, Phosphine free Pd-Catalyzed Annulations of Aryl Bromides with Diarylacetylenes

Ansuman Bej, Amarnath Chakraborty, Amitabha Sarkar\*

*Department of Organic Chemistry, Indian Association for the Cultivation of Science,*

*Kolkata 700 032*

[ocas@iacs.res.in](mailto:ocas@iacs.res.in)

## *Table of Contents*

|                                                                              |                  |
|------------------------------------------------------------------------------|------------------|
| <b>General Information</b> .....                                             | <b>S2</b>        |
| <b>General Procedure for the Pd Catalyzed annulation Reaction</b> .....      | <b>S2</b>        |
| <b>Preparation of Pd nanoparticles</b> .....                                 | <b>S3</b>        |
| <b><sup>1</sup>H and <sup>13</sup>C NMR Spectrum for all Compounds</b> ..... | <b>S4 – S29</b>  |
| <b>Crystallographic information</b> .....                                    | <b>S29 – S30</b> |
| <b>Isomeric products – some representative NMR data</b> .....                | <b>S31 – S33</b> |
| <b><sup>1</sup>H-NMR spectrum of Homo-coupling Products</b> .....            | <b>S34 – S35</b> |
| <b>References</b> .....                                                      | <b>S36</b>       |

## General Information

All chemicals were purchased from commercial suppliers (Aldrich, Merck, Avra and SRL) and used as received. All reactions were carried out in a oven-dried flask under argon atmosphere. Column chromatography was performed with silica gel 230~400 mesh. All  $^1\text{H}$ ,  $^{13}\text{C}$  NMR spectra were recorded on a Bruker-Avance DPX300 and Bruker-Avance III DPX500 for a  $\text{CDCl}_3$  solution and reported in ppm ( $\delta$ ). Electrospray ionisation mass spectroscopy (ESI-MS) experiments were carried out on Microtek QtoF Micro YA 263 spectrometer in positive ion ESI mode. Transmission electron microscopy (TEM): TEM pictures were taken on a JEM-2011 (JEOL) microscope.

## General Procedure for the Pd-Catalyzed Annulation Reaction:

Weighted amount of  $\text{K}_2\text{PdCl}_4$  (16 mg, 5 mol%) and PEG 600 (700 mg, 1.16 mmol) was heated at 70 °C for 15 min to form colloidal Pd. Then it was cooled at room temperature, aryl bromide (1 mmol) and diphenylacetylene (2 mmol) and NaOAc (182 mg, 2 eq) were added then stirred at 80 °C for the specified time. Then the reaction mixture was allowed to cool at room temperature, extracted with dichloromethane and the organic layers were dried over anhydrous  $\text{Na}_2\text{SO}_4$  and concentrated in vacuum. The residue thus obtained was purified by flash column chromatography on silica gel (230~400 mesh) with a mixture of ethyl acetate (2-10%) and petroleum ether as eluent.

## Preparation of Pd nanoparticles

Weighted amount of  $K_2PdCl_4$  (16 mg, 5 mol%) and PEG 600 (700 mg, 1.16 mmol) was heated at 70 °C for 15 min to form colloidal Pd.

The nanoparticle formed is characterized by TEM (Figure 1). The average size of the nanoparticles before and after the reaction was 3.8 and 3.4 nm respectively.

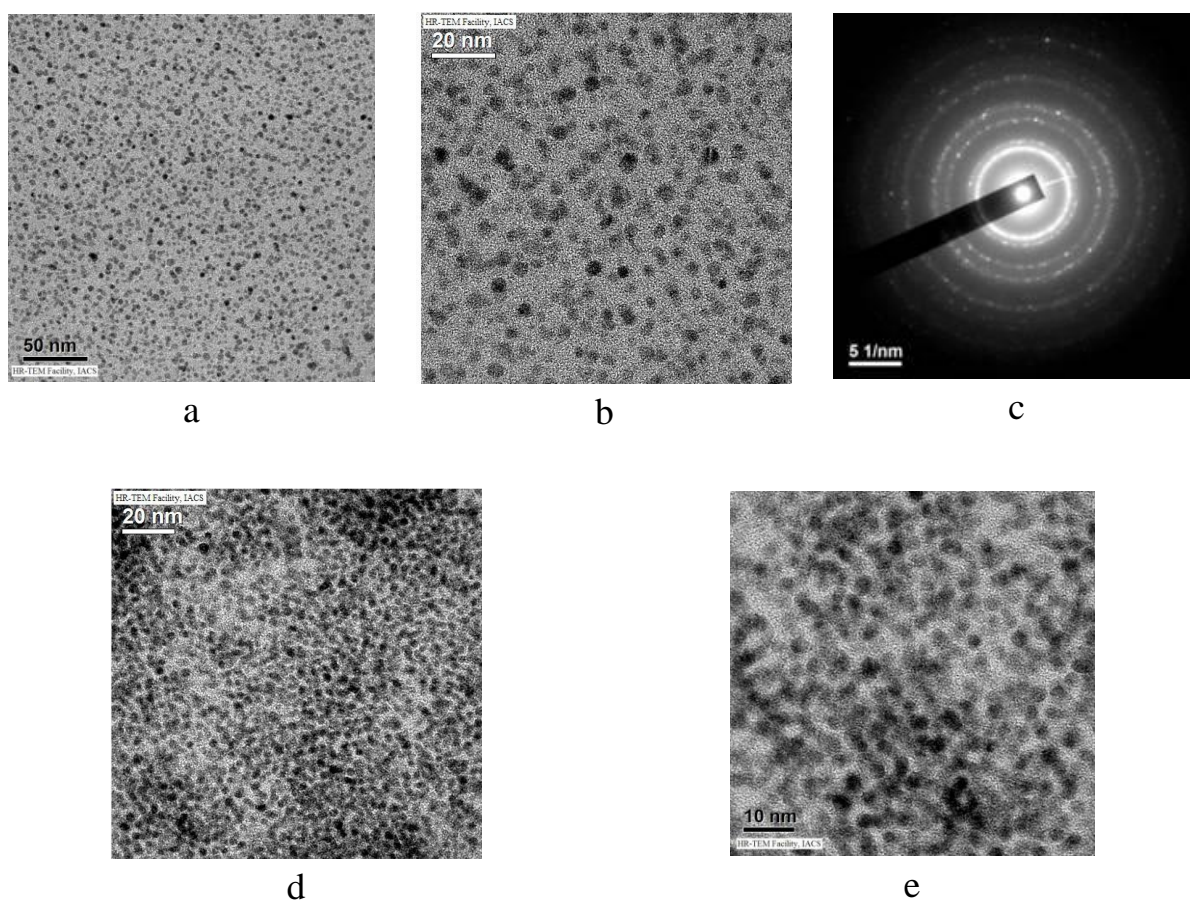

**Figure 1.** (a) TEM image of Palladium nanoparticles, (b) HRTEM image of Palladium nanoparticles, (c) Electron diffraction pattern of palladium nanoparticles, (d) TEM image of palladium nanoparticles after reaction, (e) HRTEM image of palladium nanoparticles after reaction.

# <sup>1</sup>H and <sup>13</sup>C NMR Spectrum for all Compounds

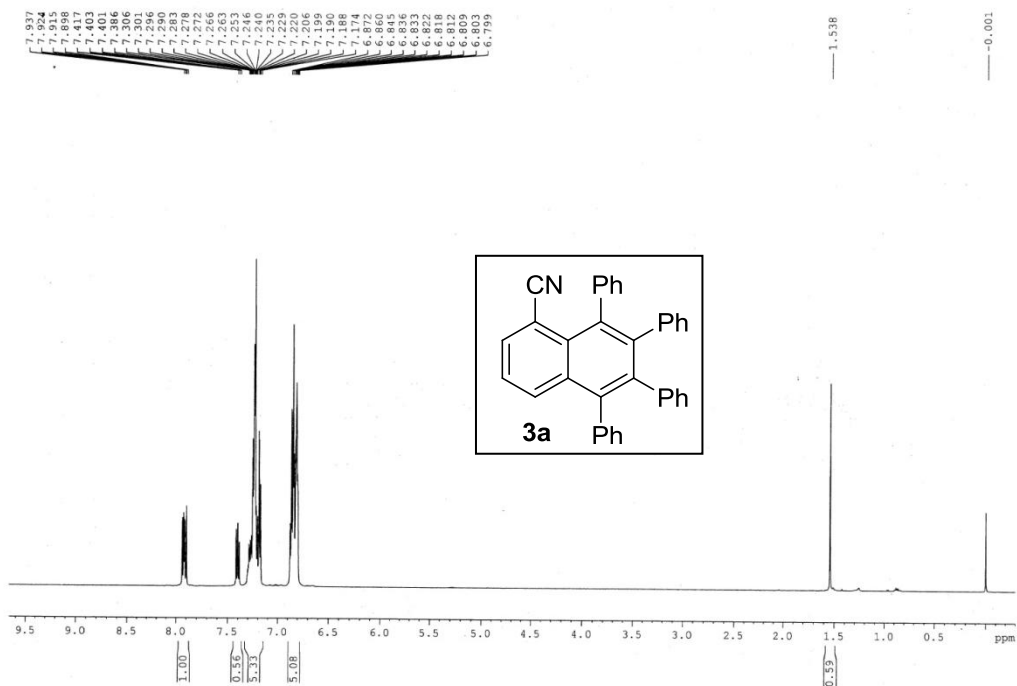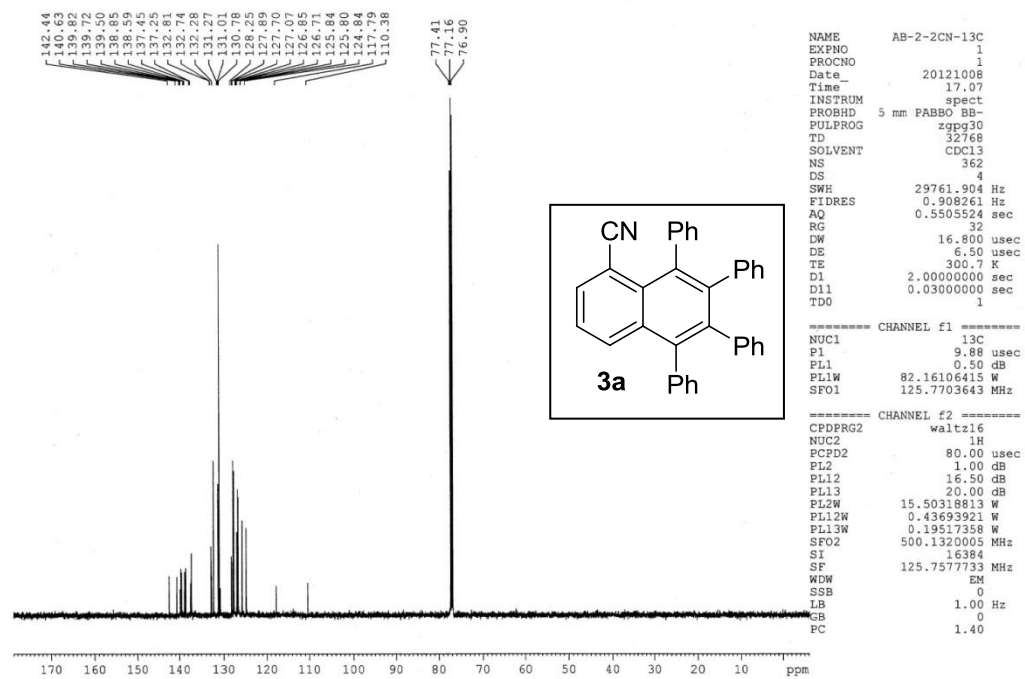

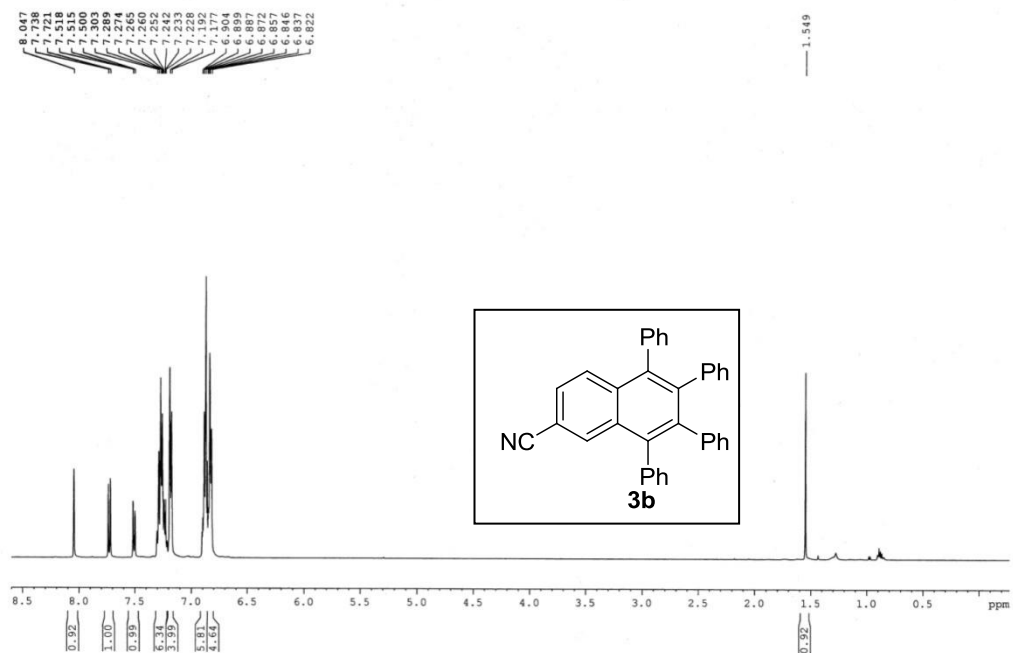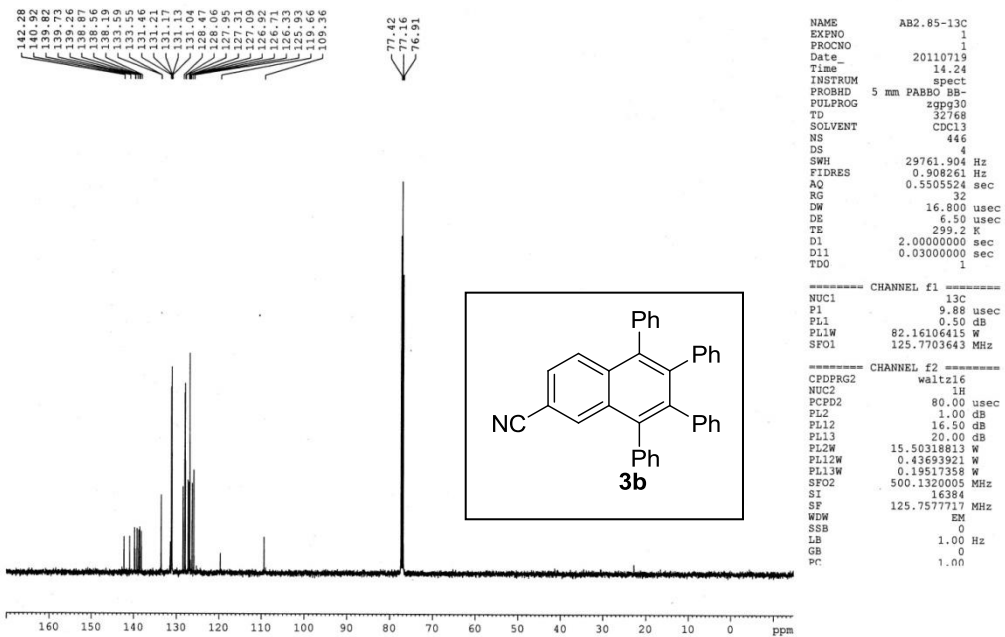

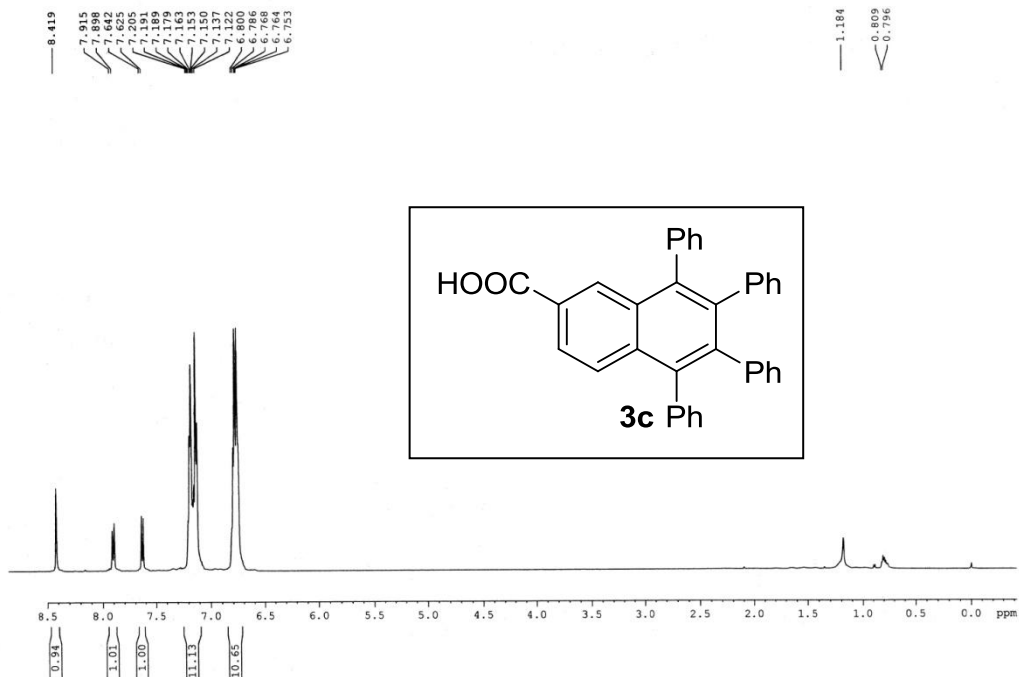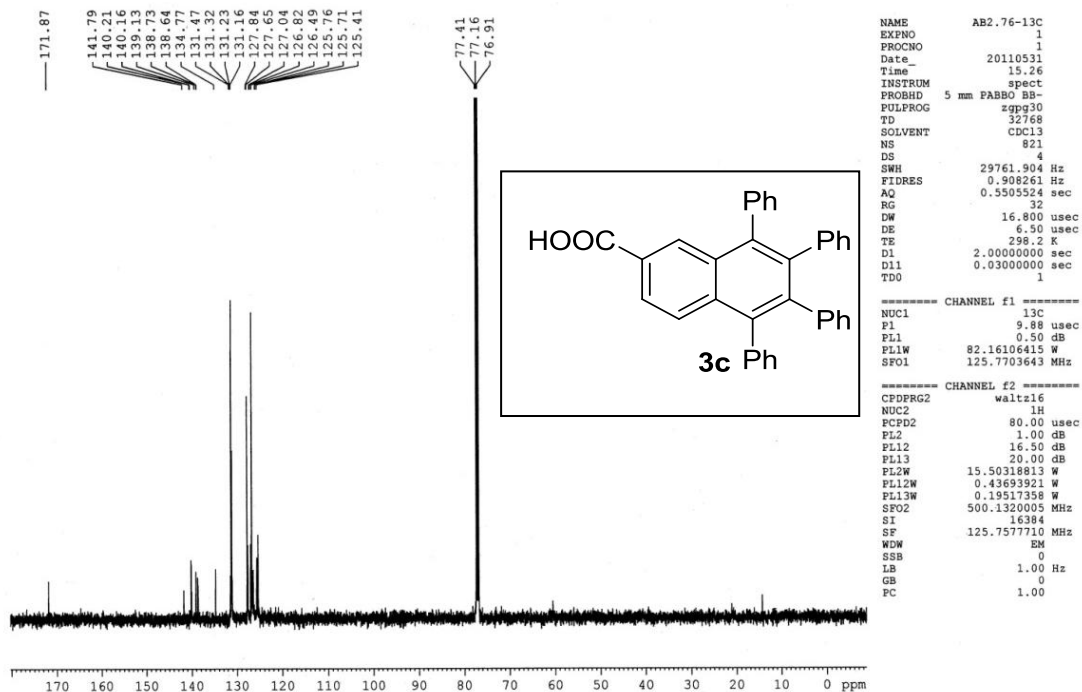

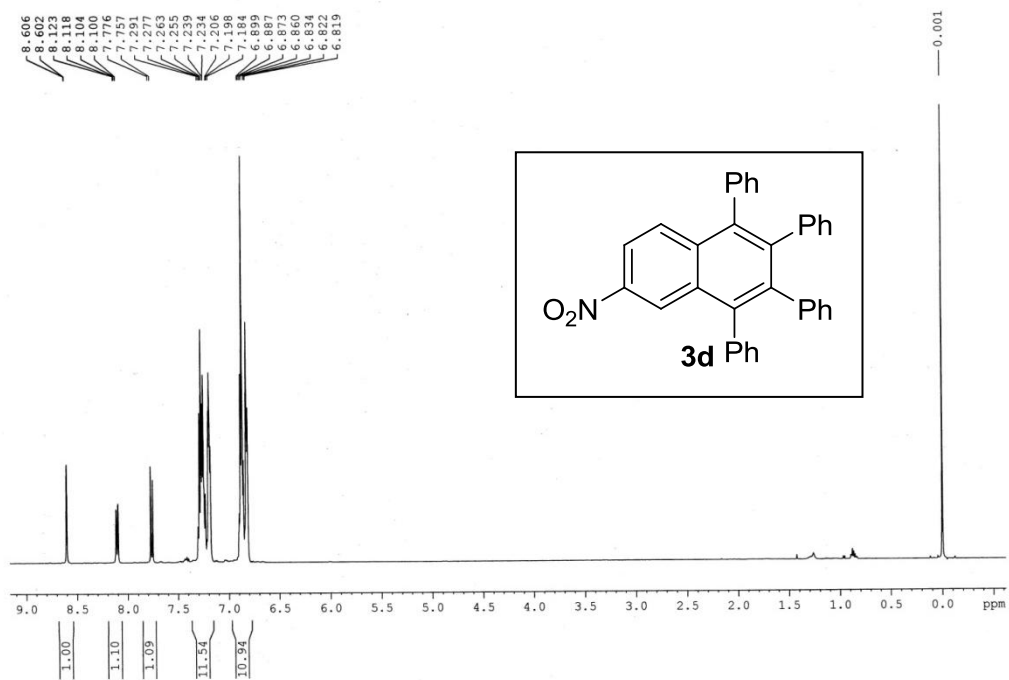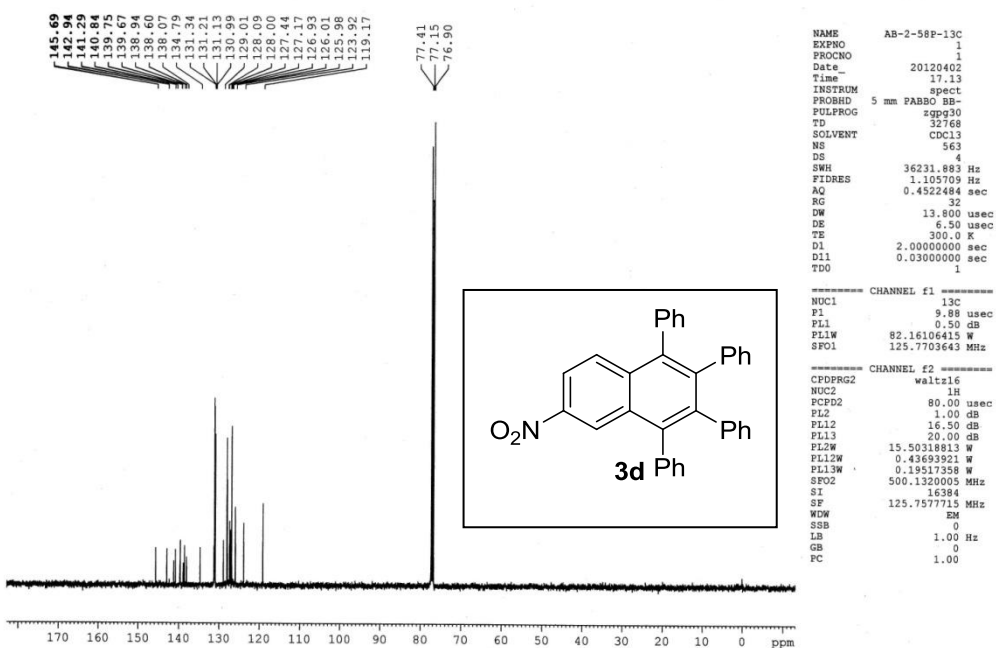

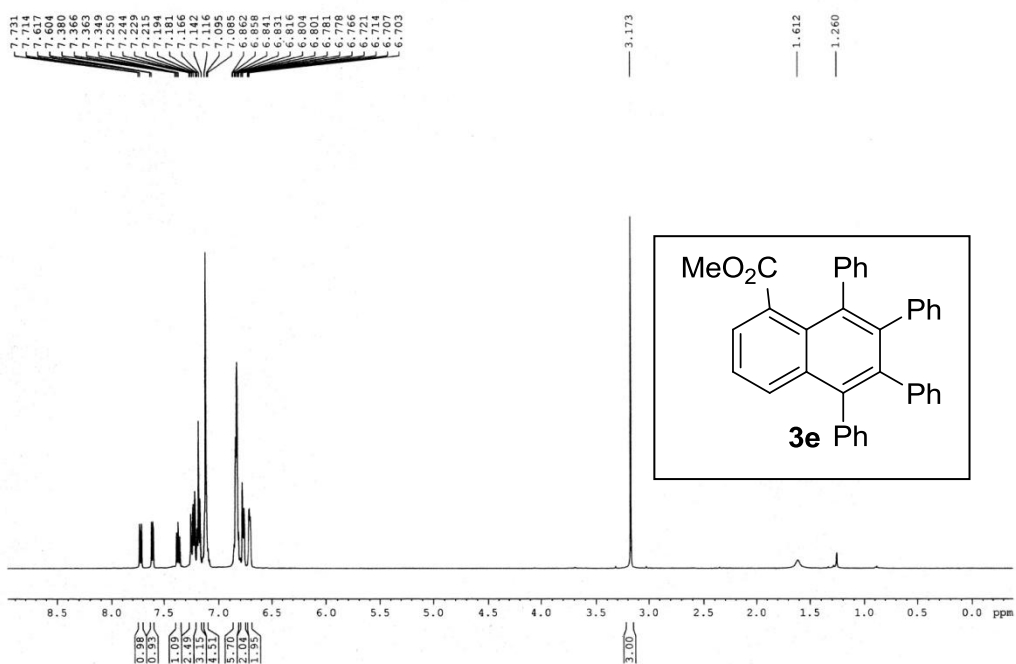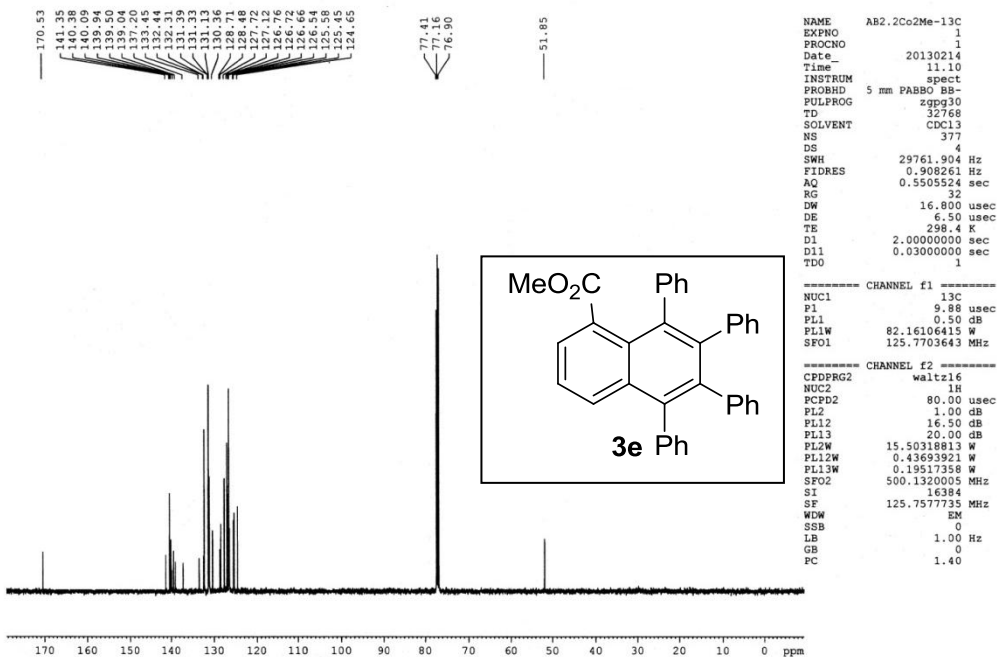



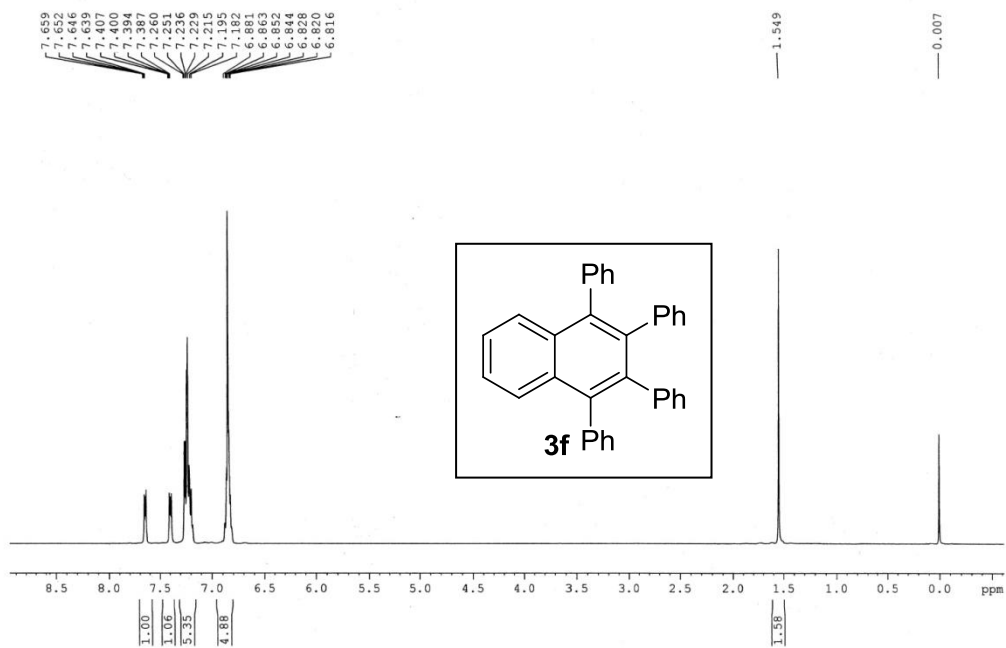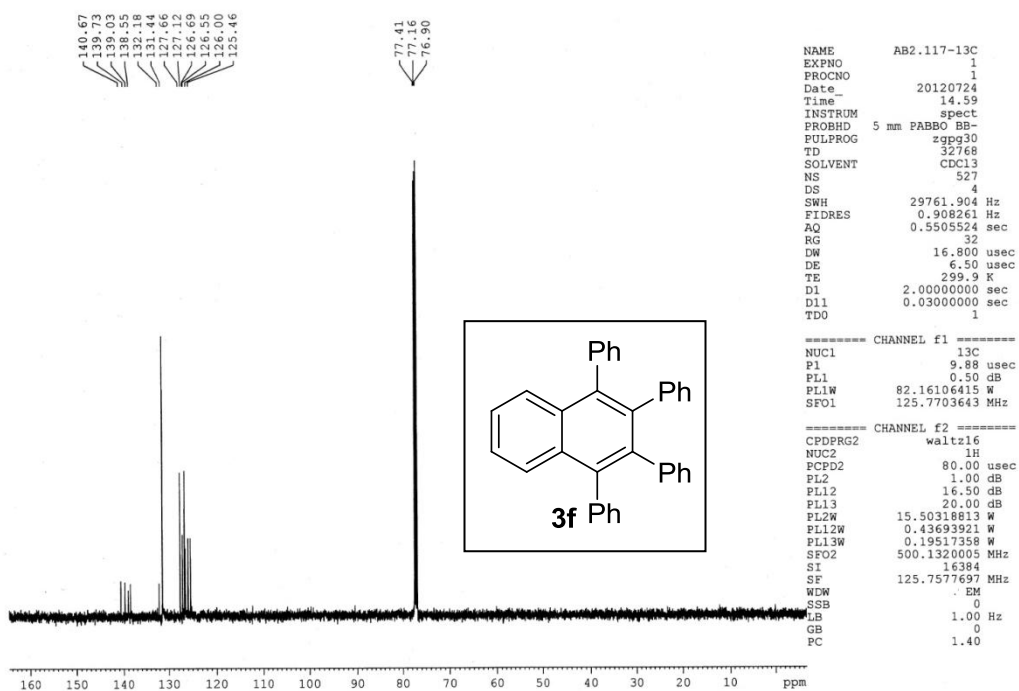

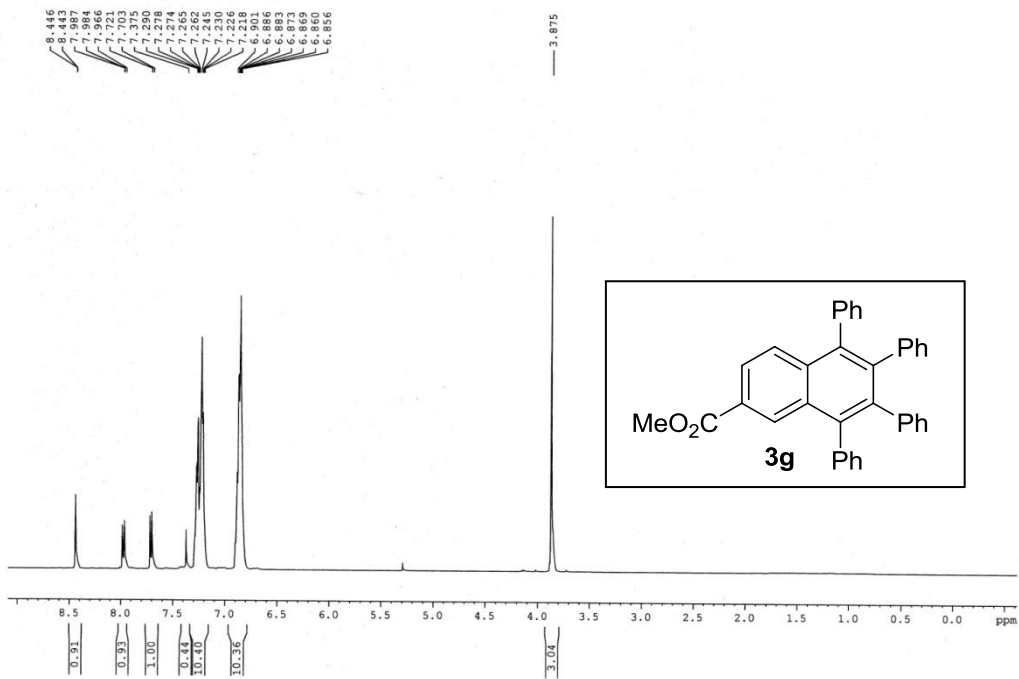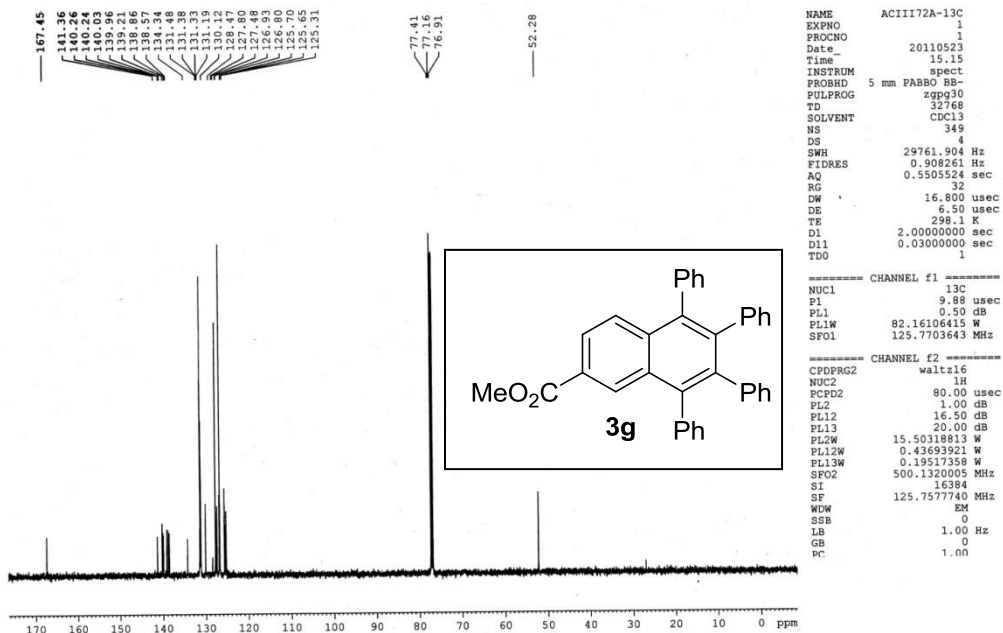

AB2.109A-1H (SKD)

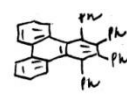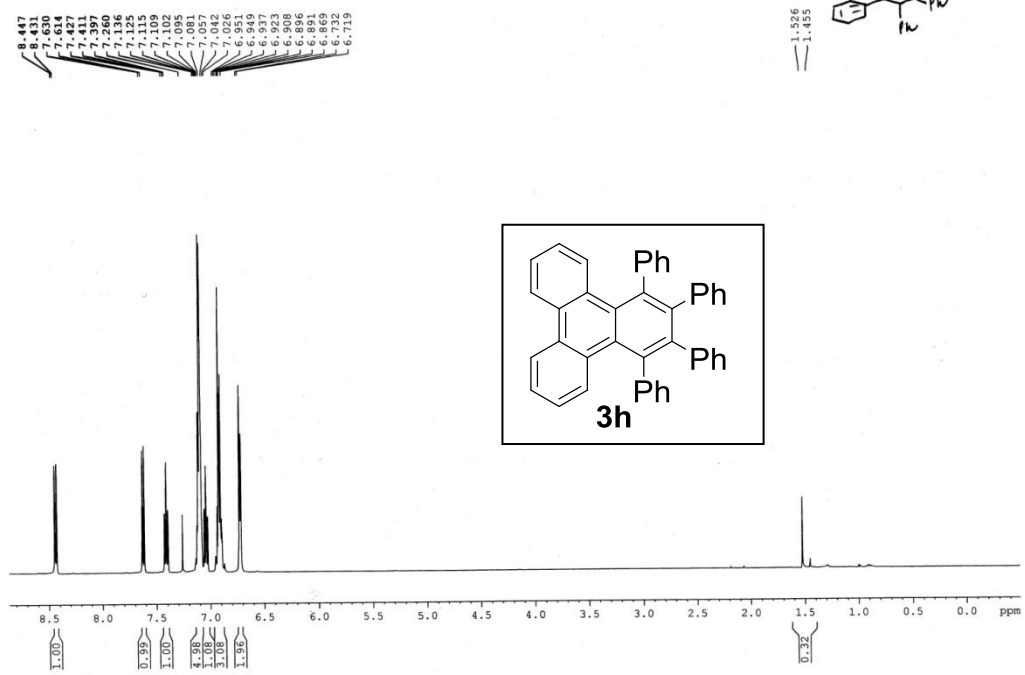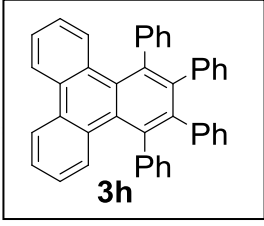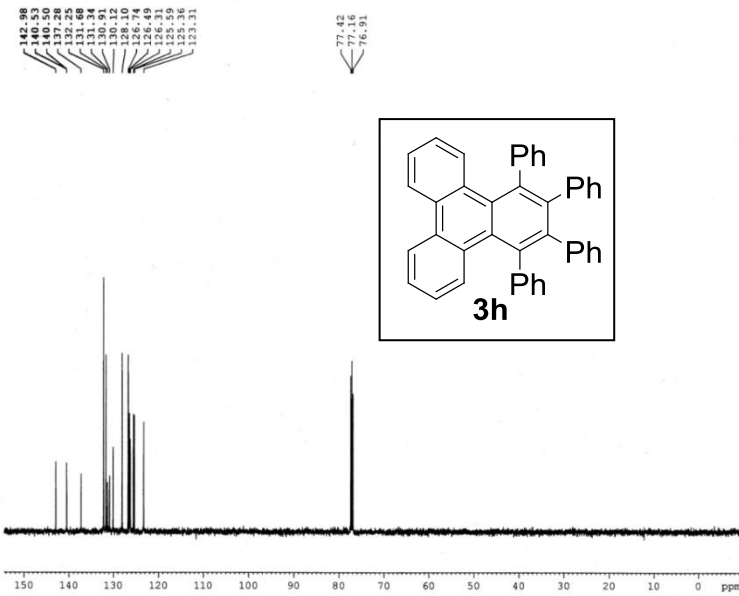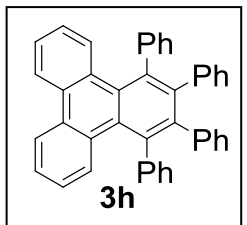

```

NAME AB2.109A-13C
EXPNO 1
PROCNO 1
Date_ 20120215
Time 14.56
INSTRUM spect
PROBHD 5 mm PABBO BB-
PULPROG zgpg30
TD 32768
SOLVENT CDCl3
NS 69
DS 4
SWH 29761.904 Hz
FIDRES 0.908261 Hz
AQ 0.5505524 sec
RG 57
DW 16.800 usec
DE 6.50 usec
TE 298.9 K
D1 2.0000000 sec
D11 0.0300000 sec
TDO 1

===== CHANNEL f1 =====
NUC1 13C
P1 9.88 usec
PL1 0.50 dB
PL1W 82.16106415 W
SF01 125.7703643 MHz

===== CHANNEL f2 =====
CPDPRG2 waltz16
NUC2 1H
PCPD2 80.00 usec
PL2 1.00 dB
PL12 16.50 dB
PL13 20.00 dB
PL2W 15.50318813 W
PL12W 0.43693921 W
PL13W 0.19517358 W
SFO2 500.1320005 MHz
SI 14384
SF 125.7577771 MHz
WDW EM
SSB 0
LB 1.00 Hz
GB 0
PC 1.00
    
```

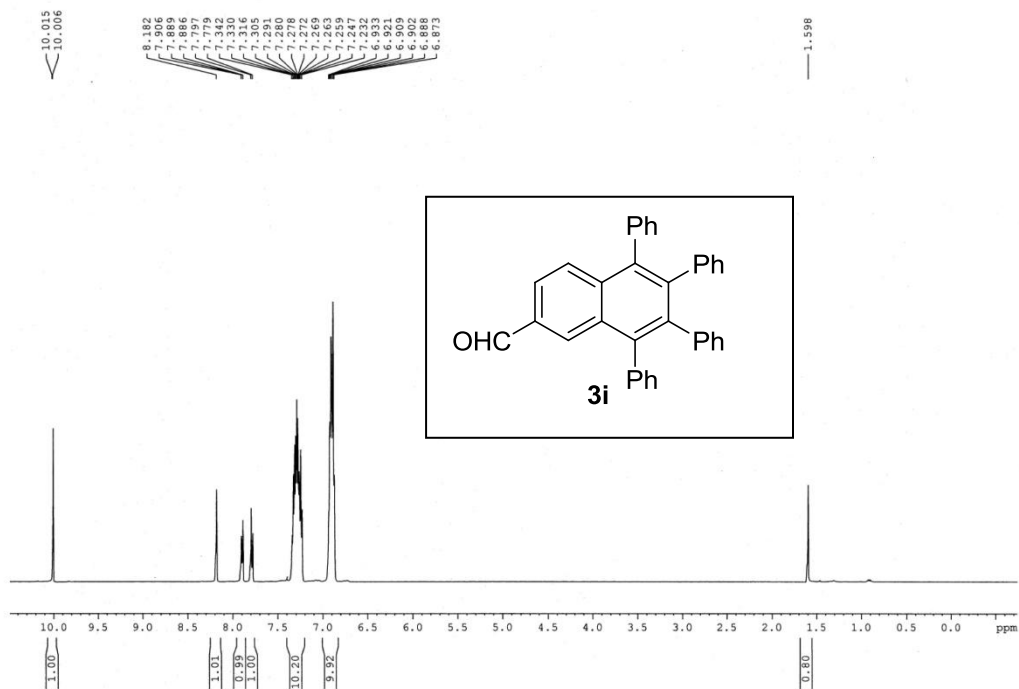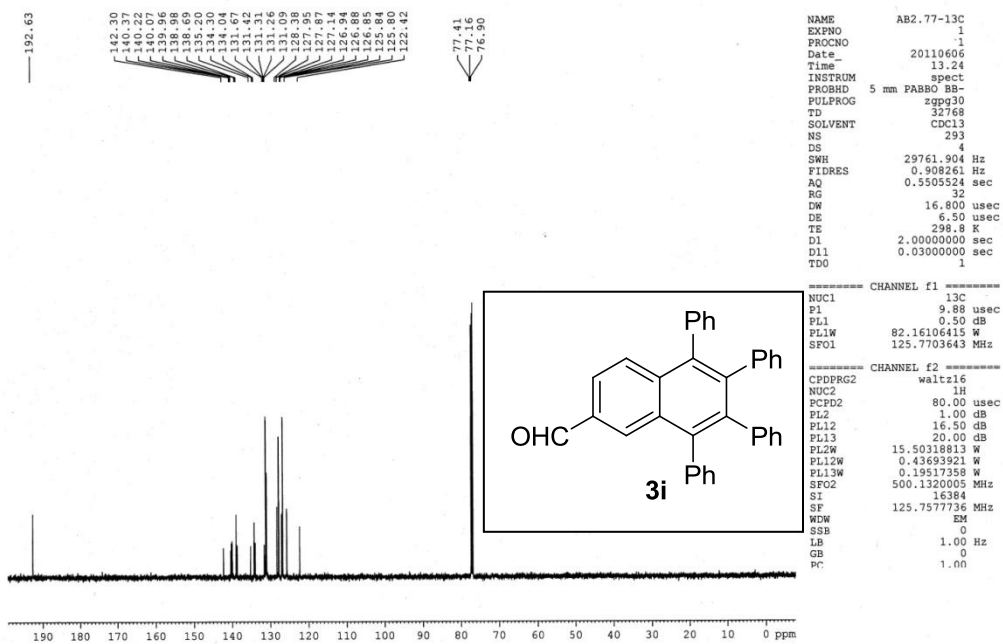

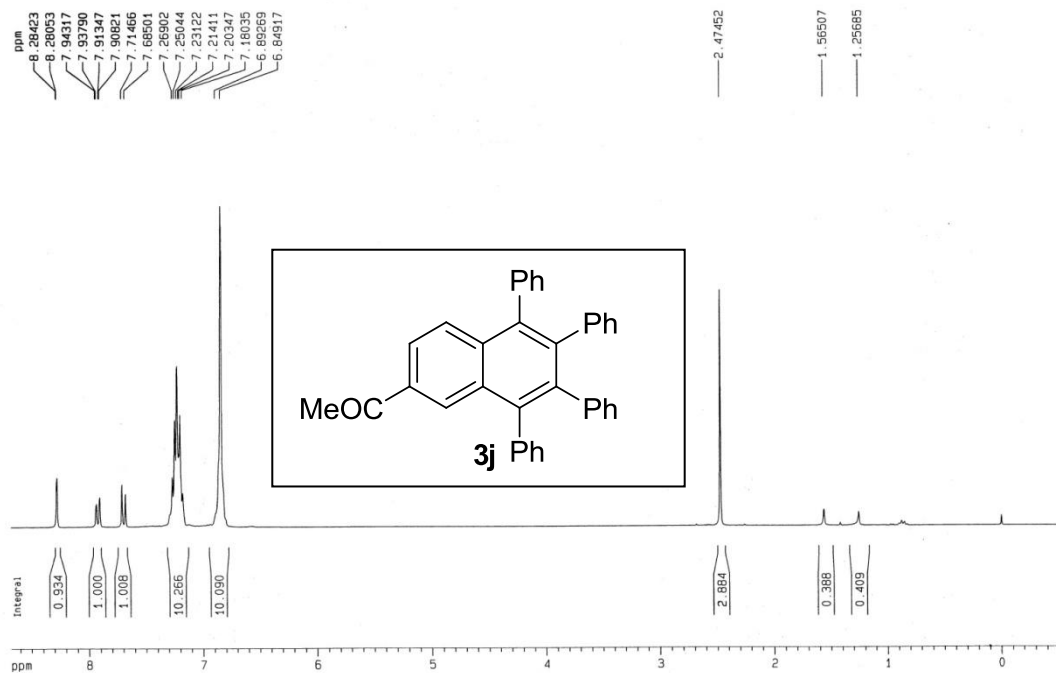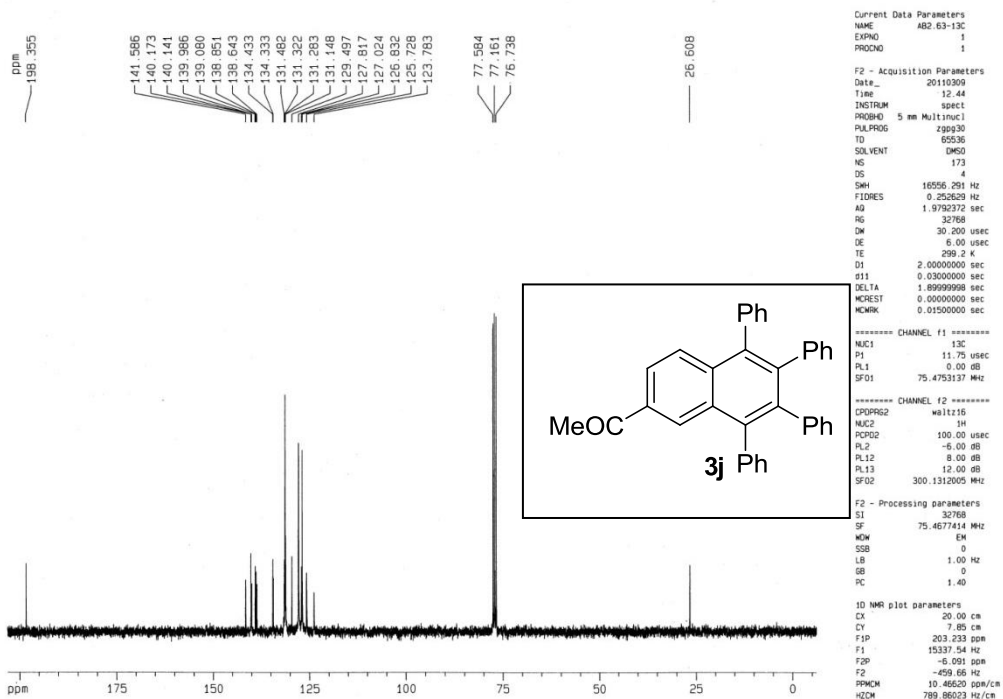

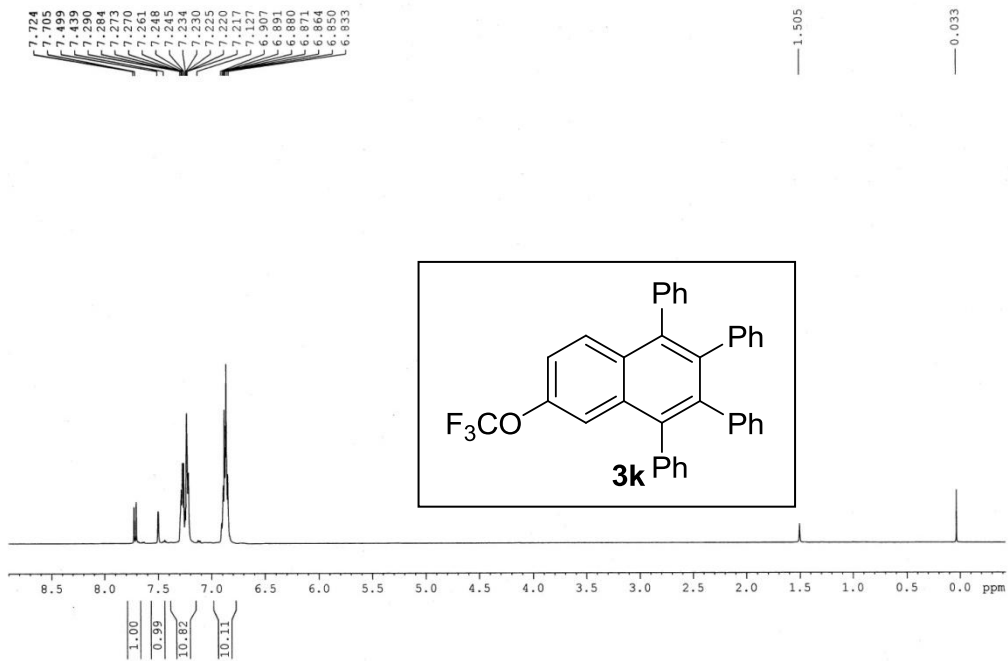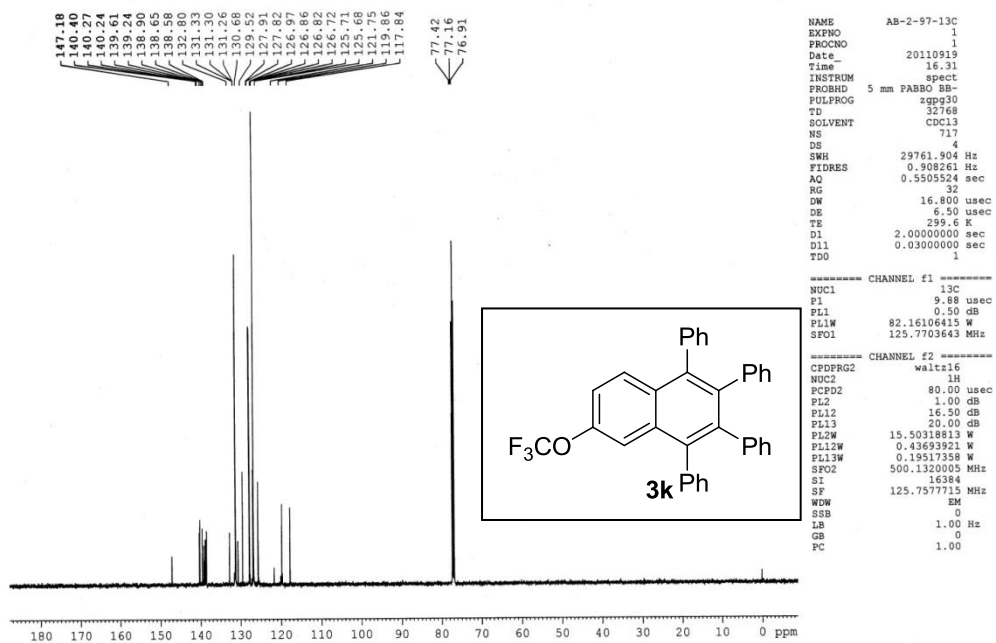

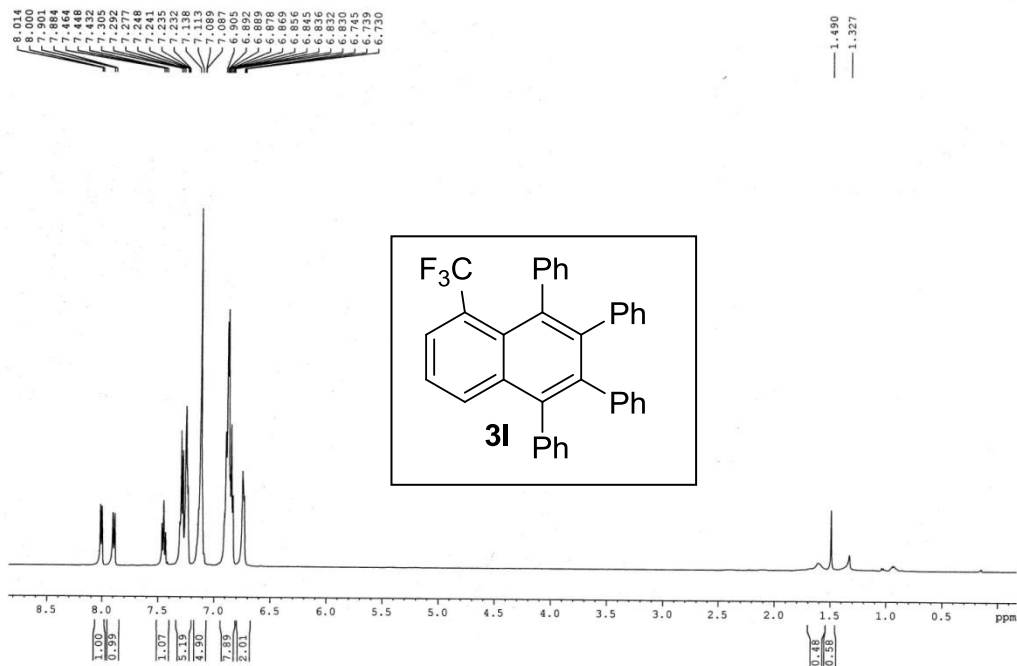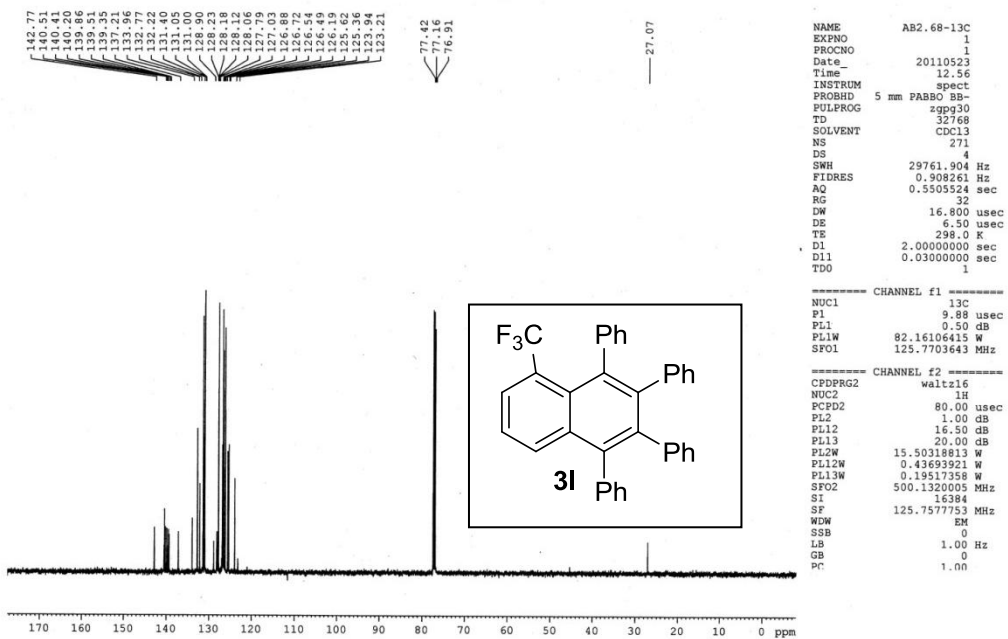

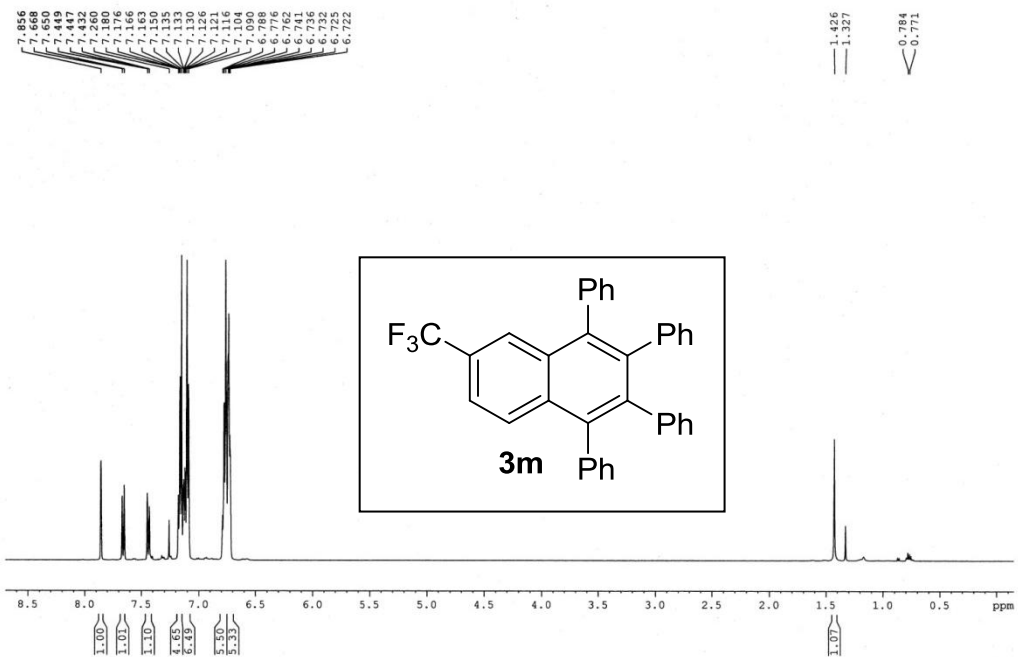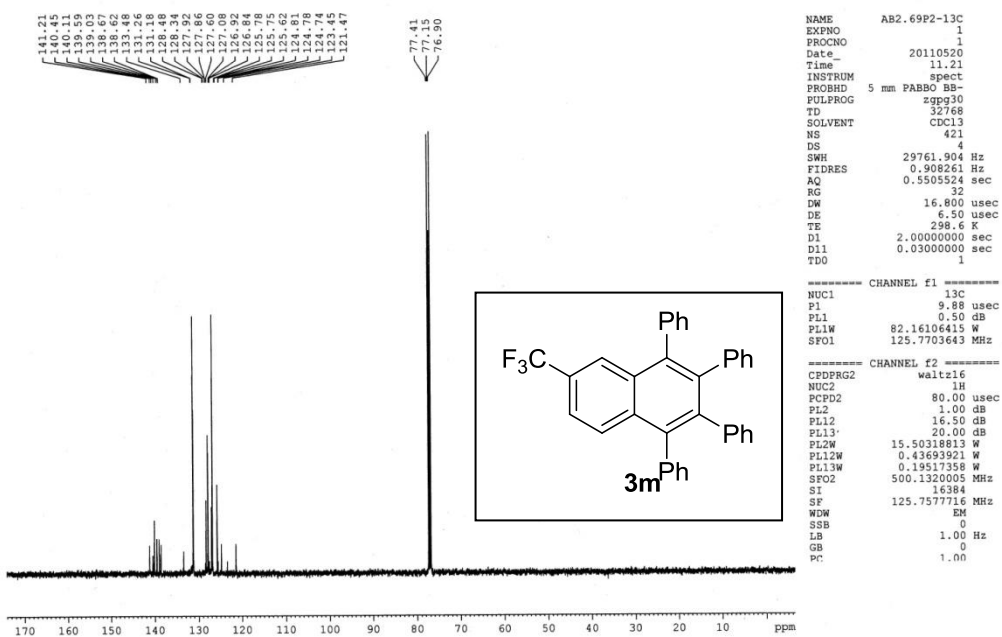



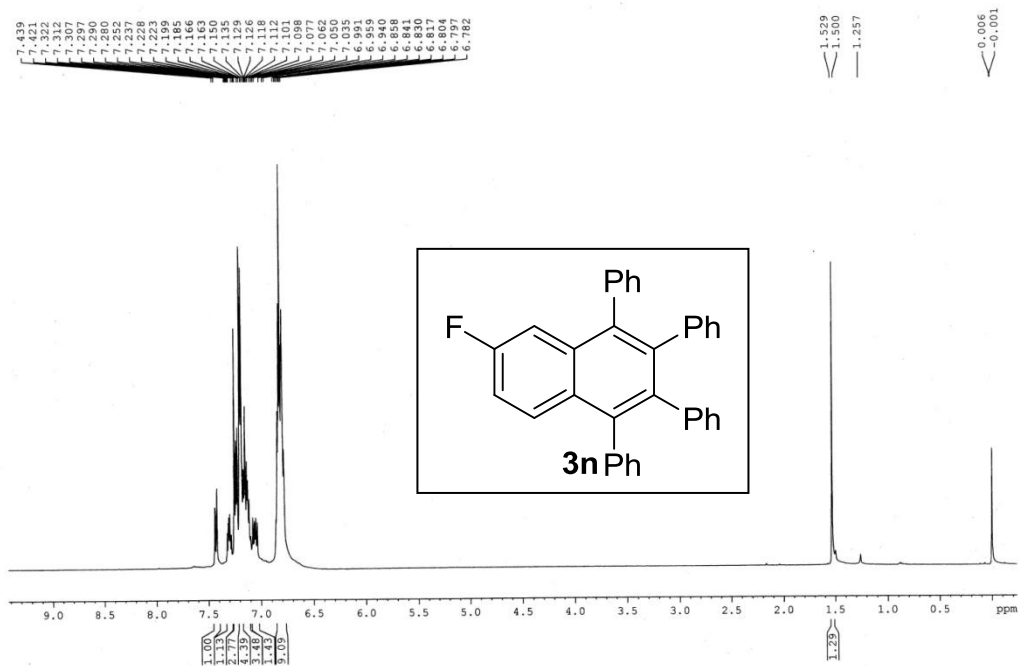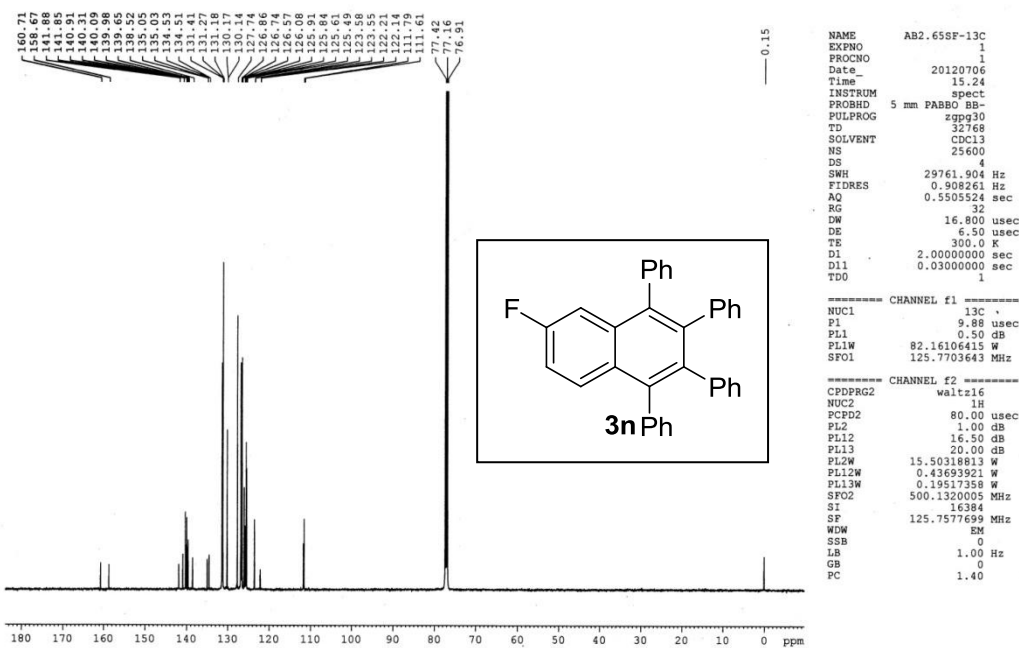

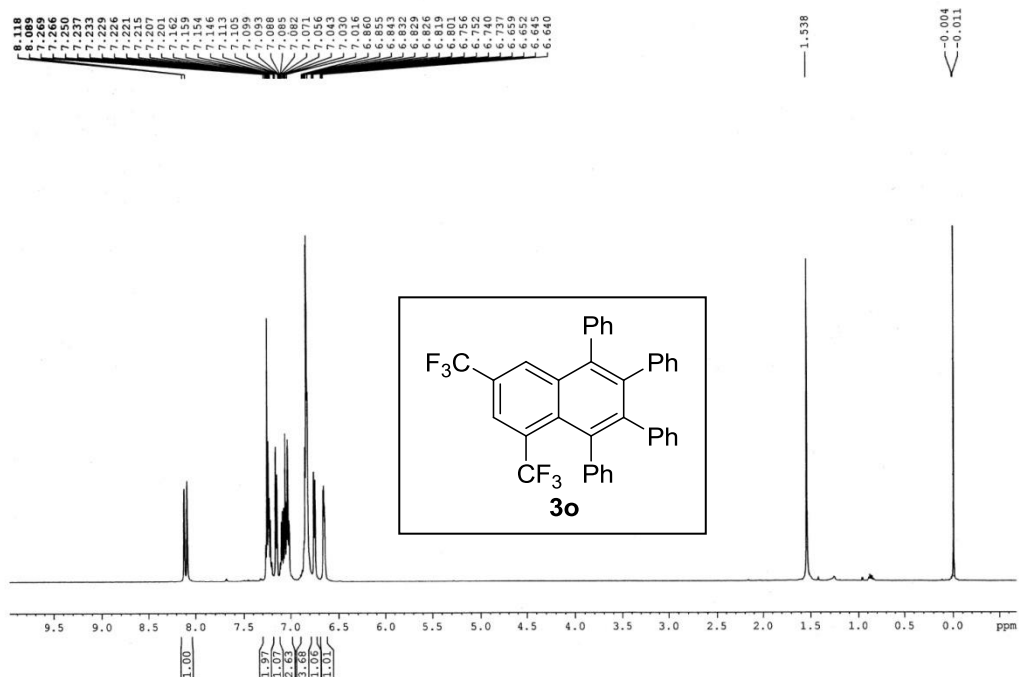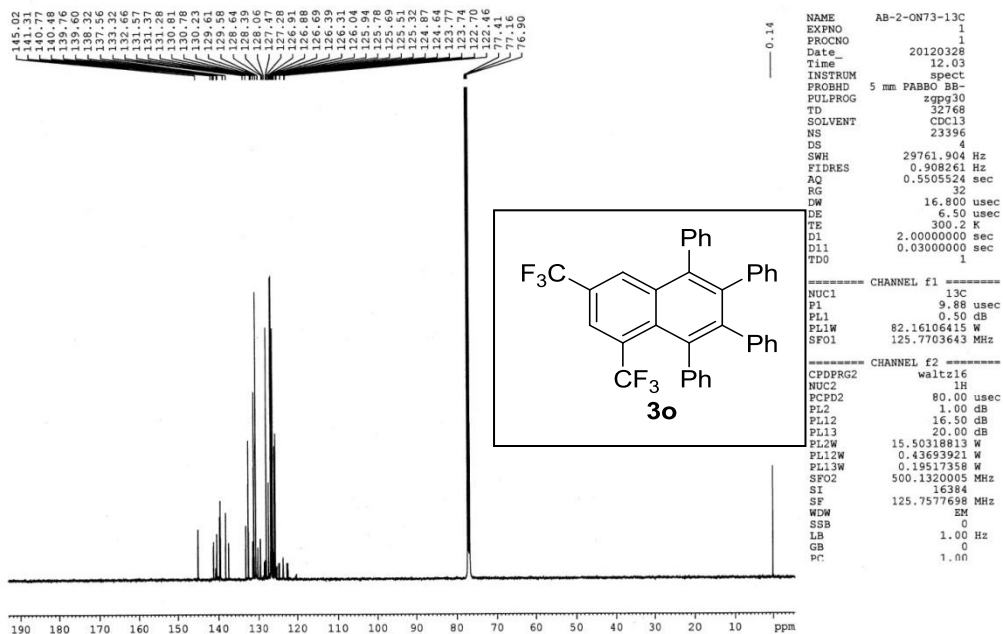

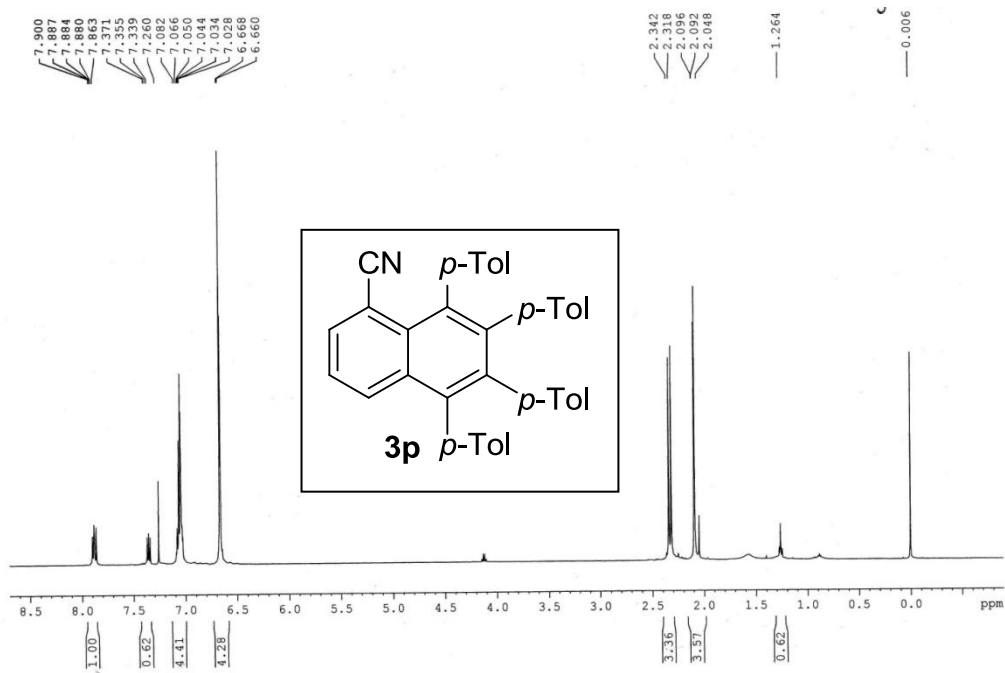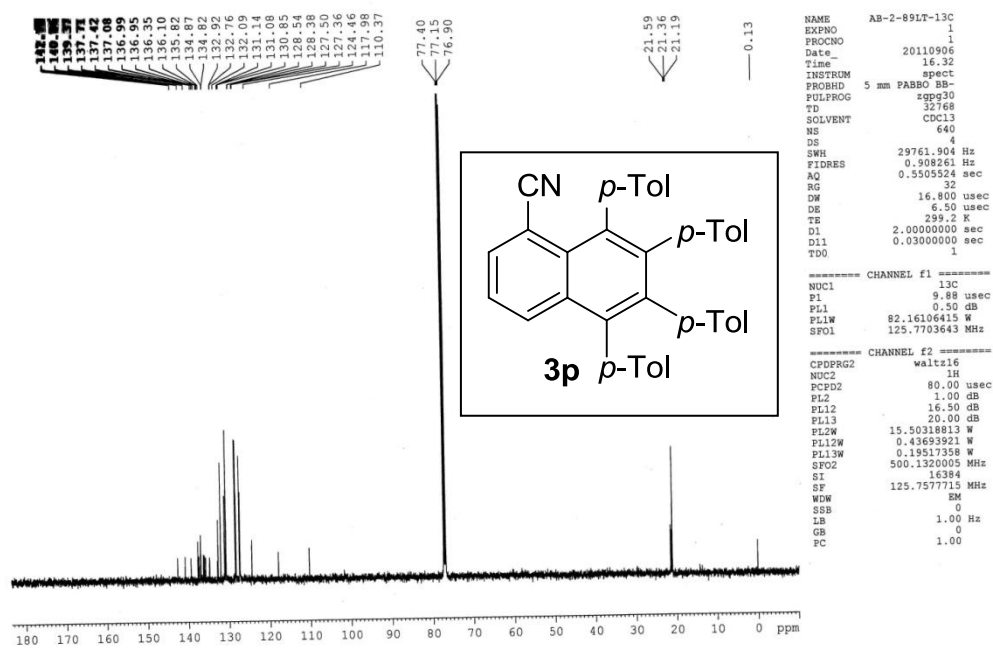

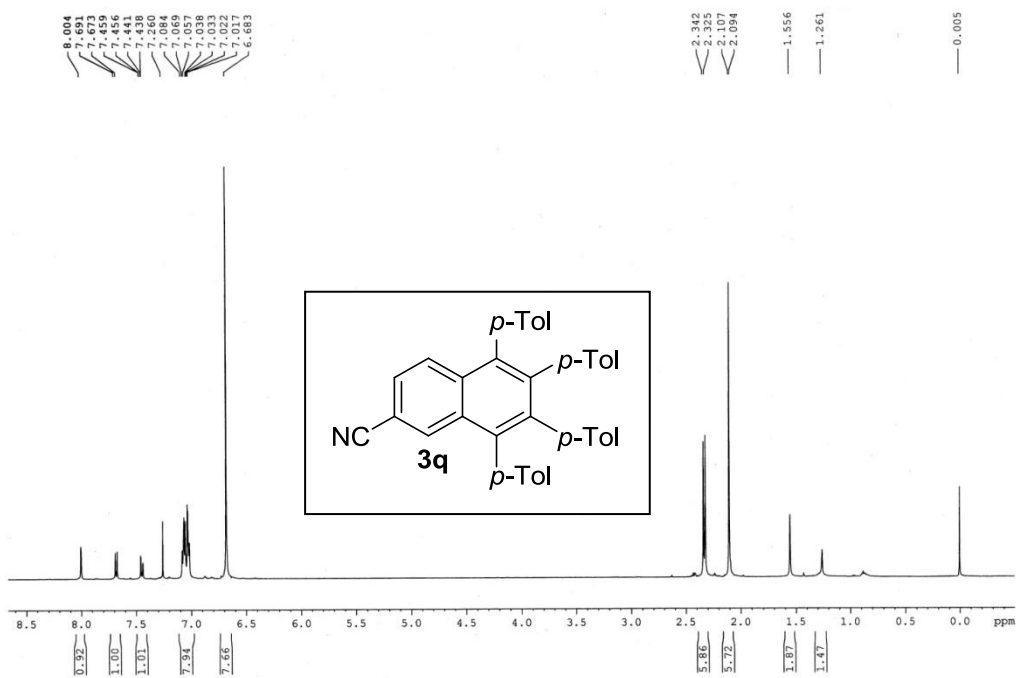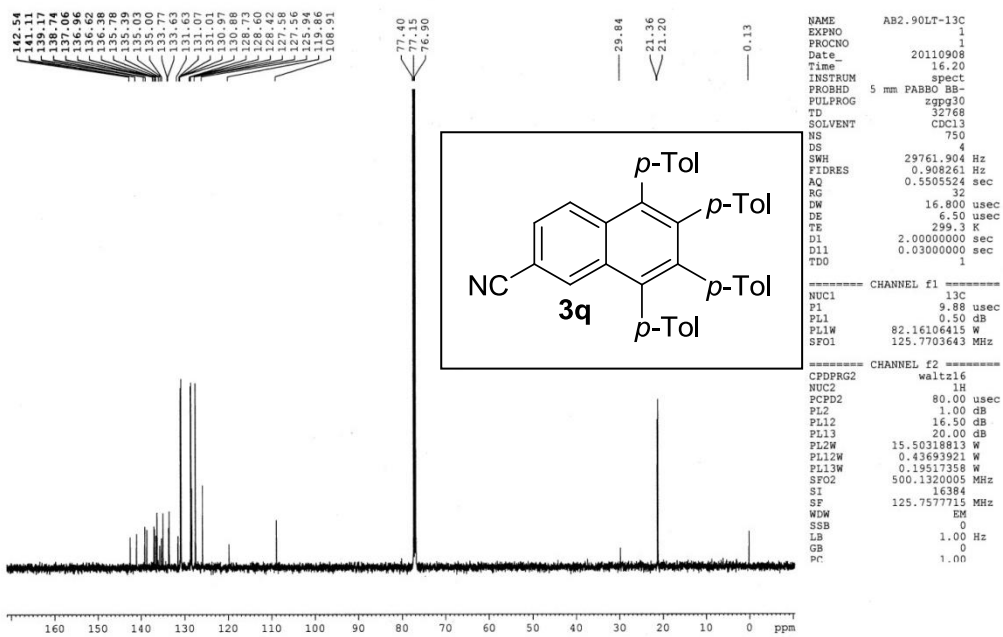

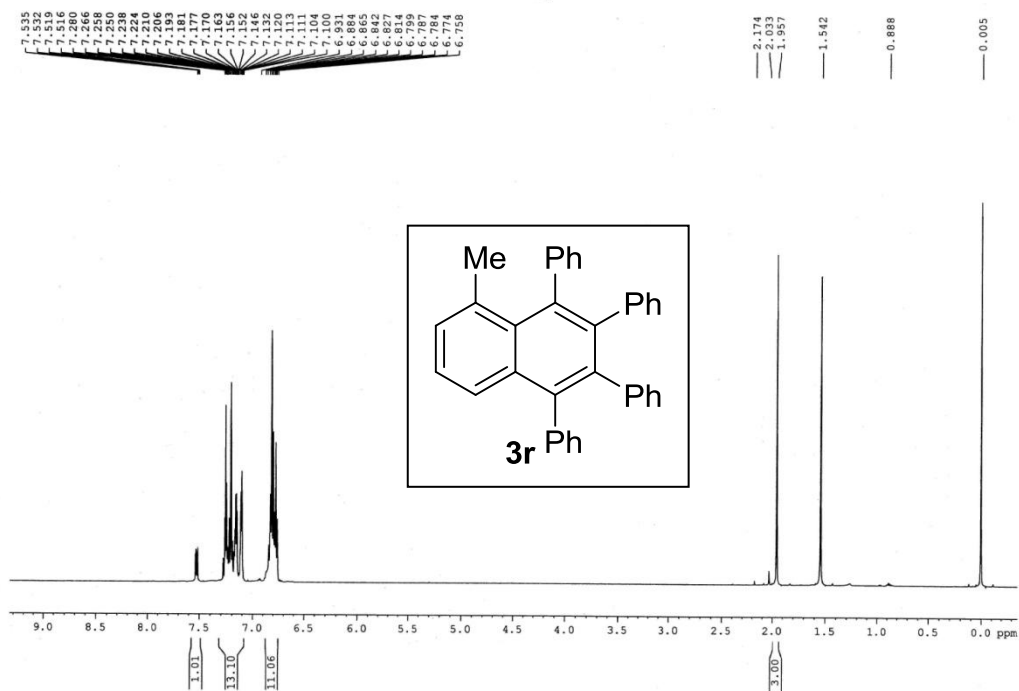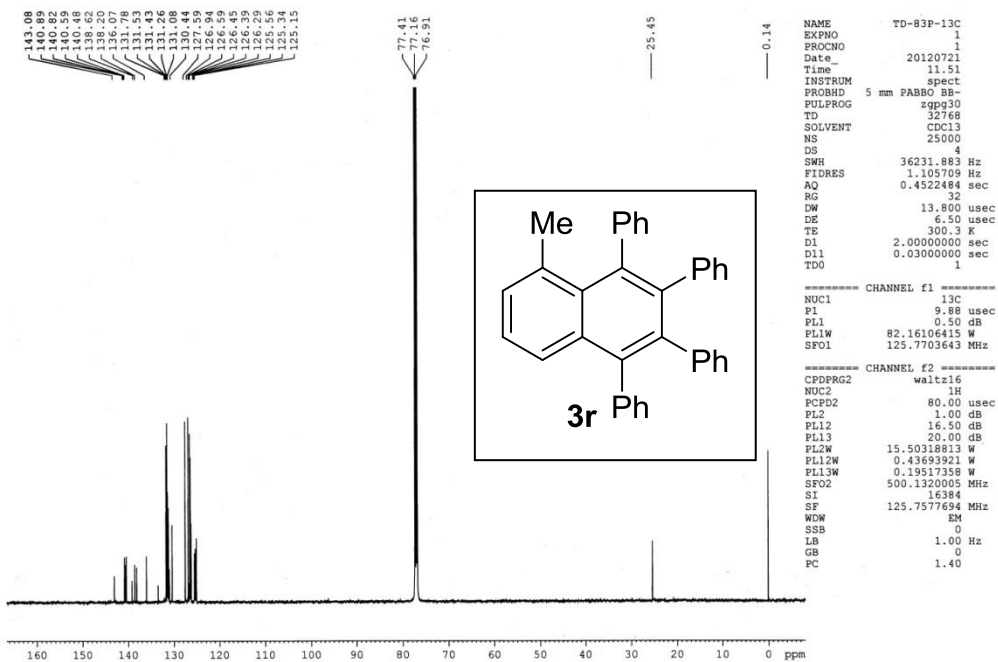

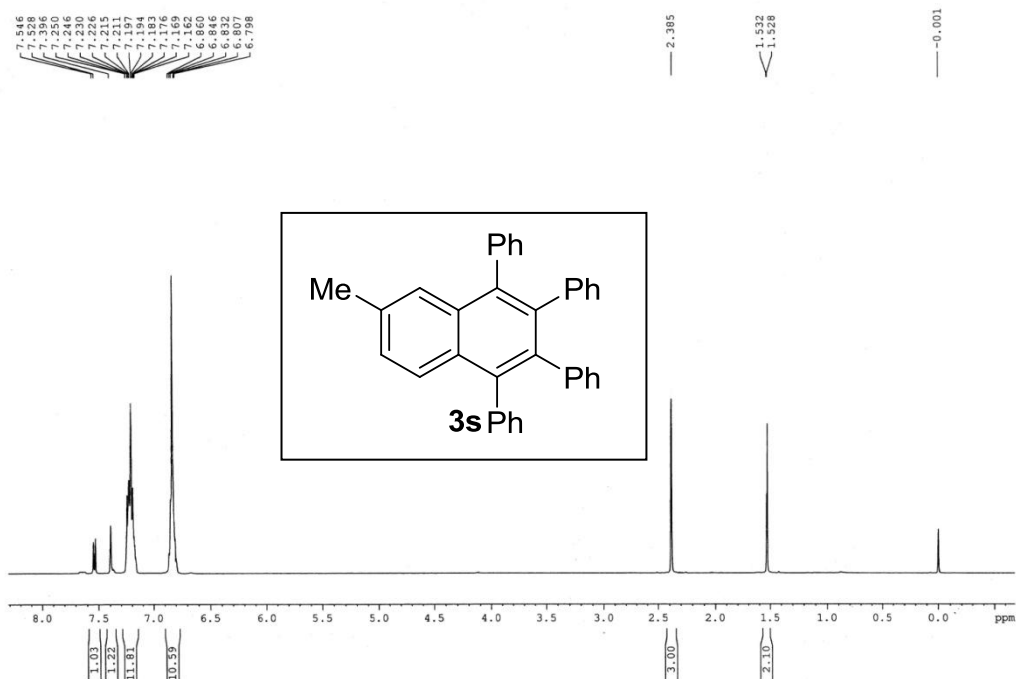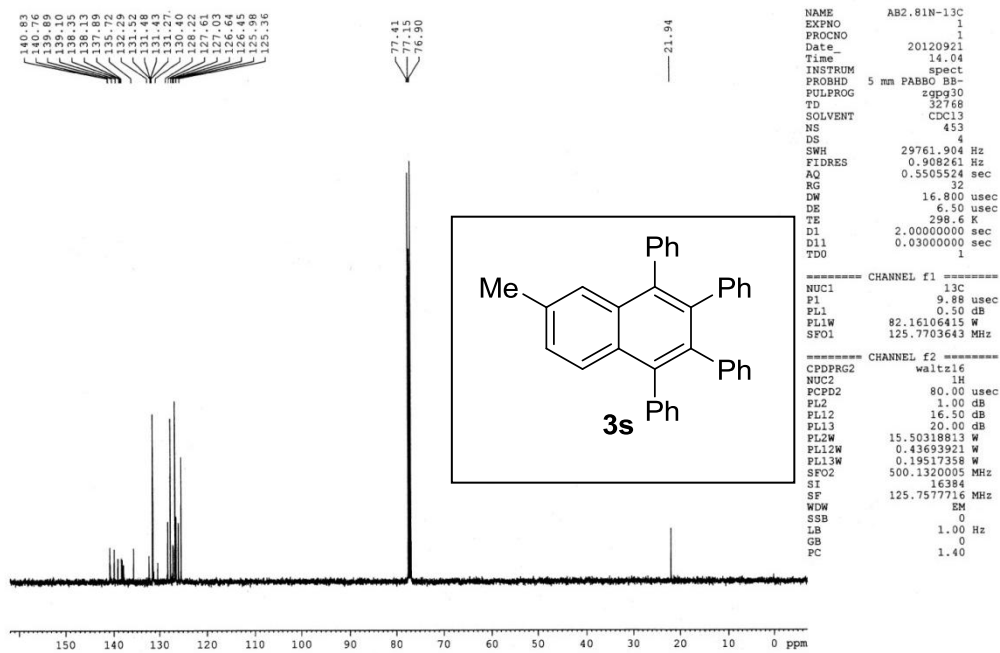

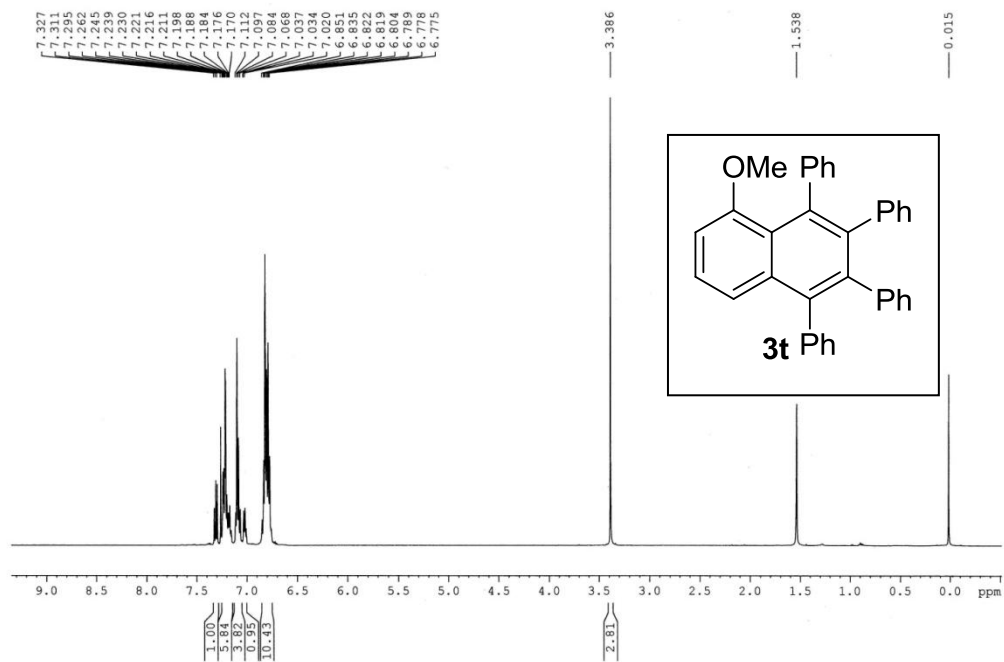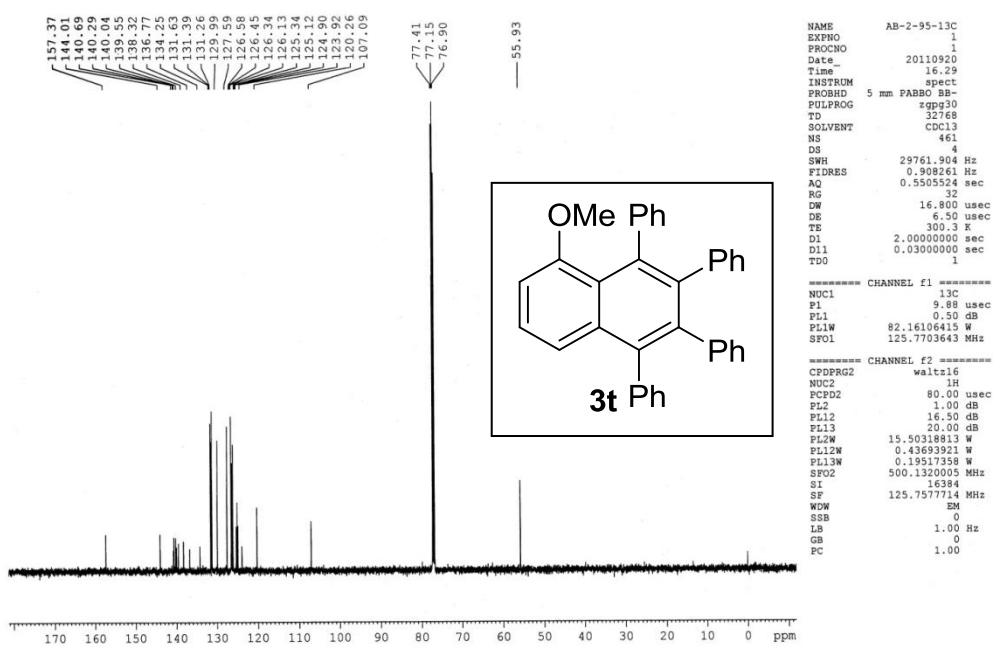

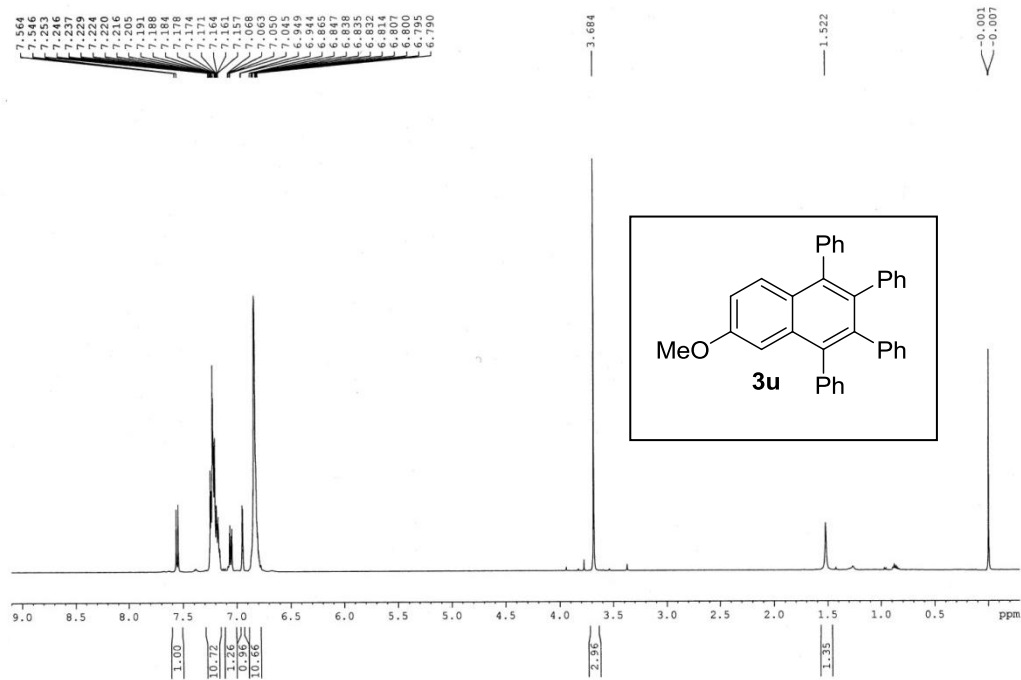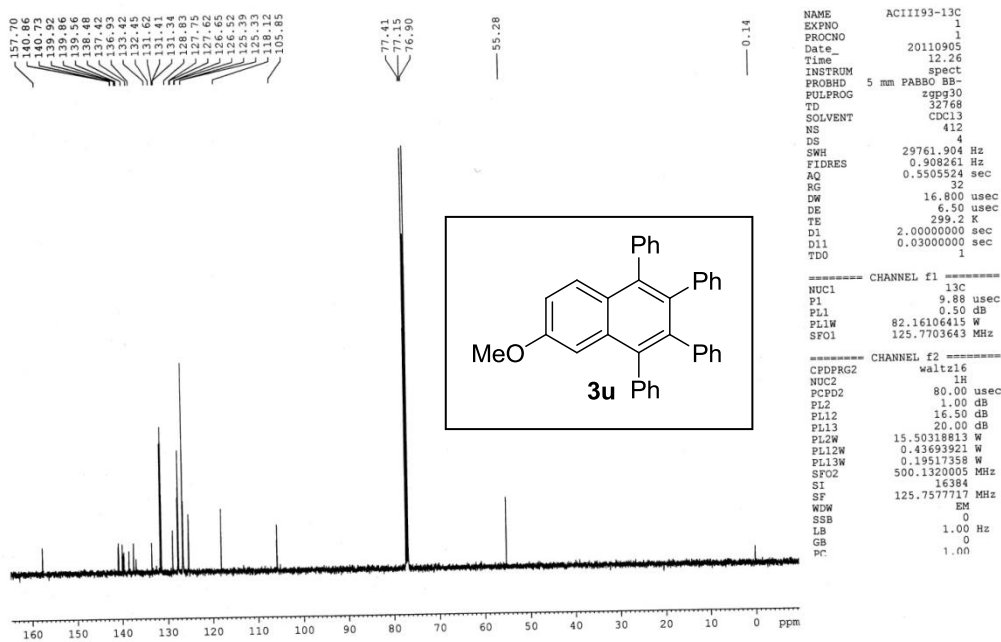



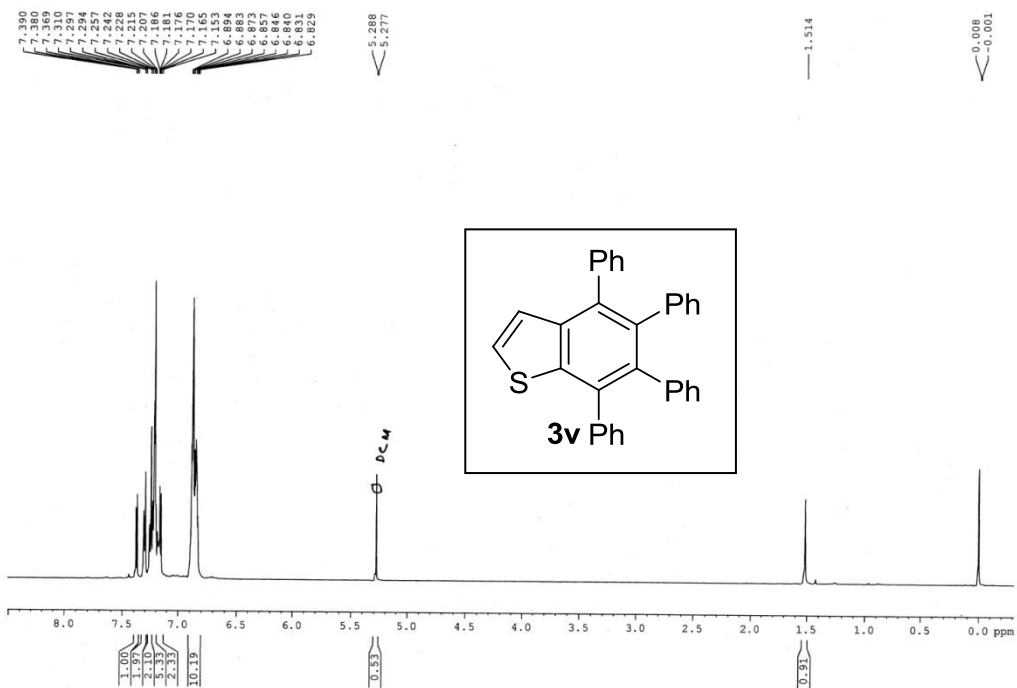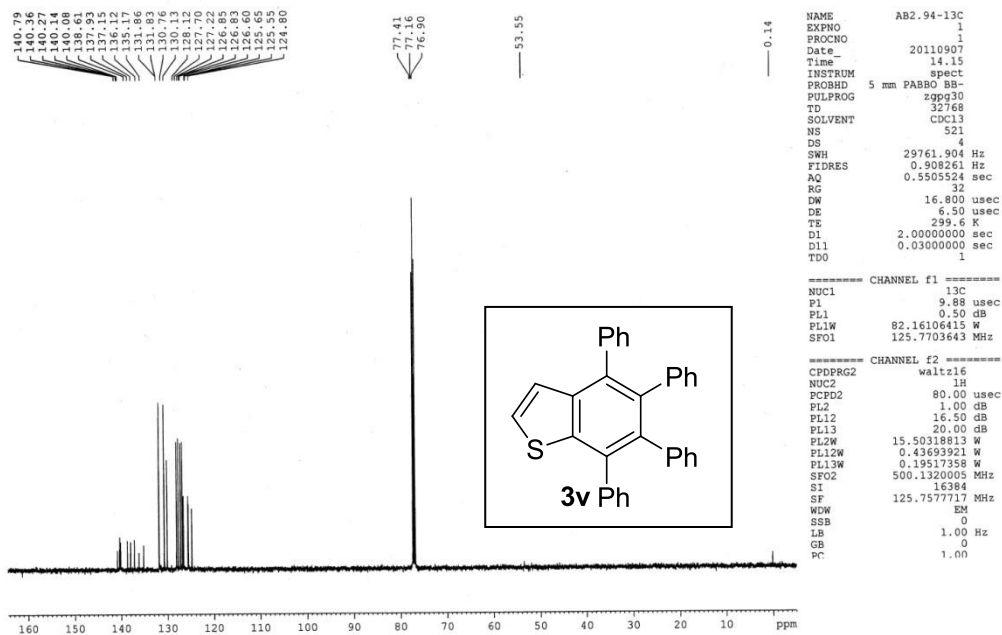

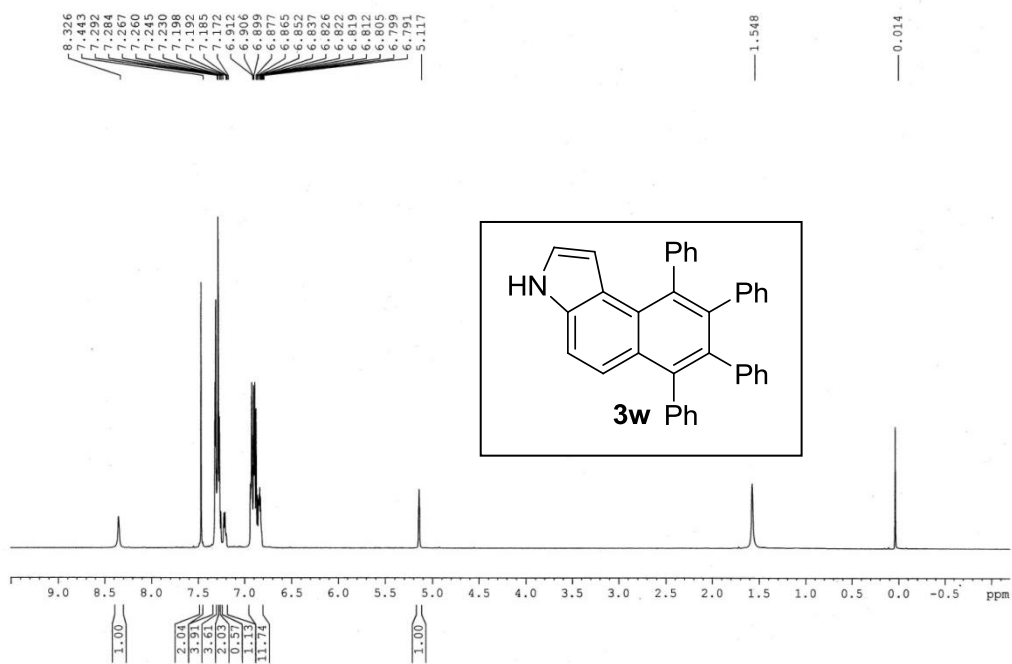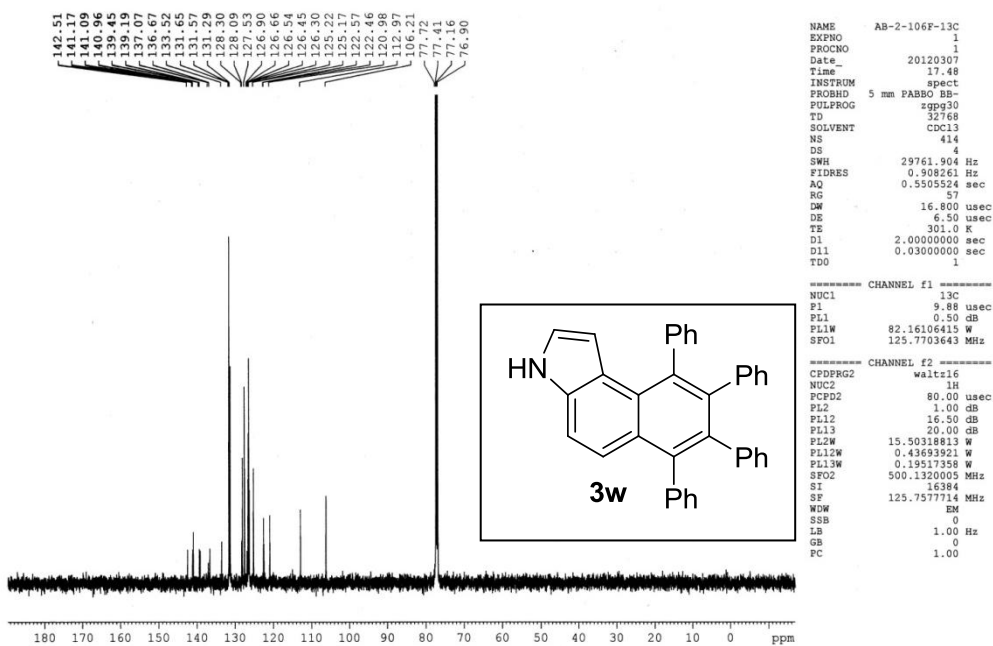

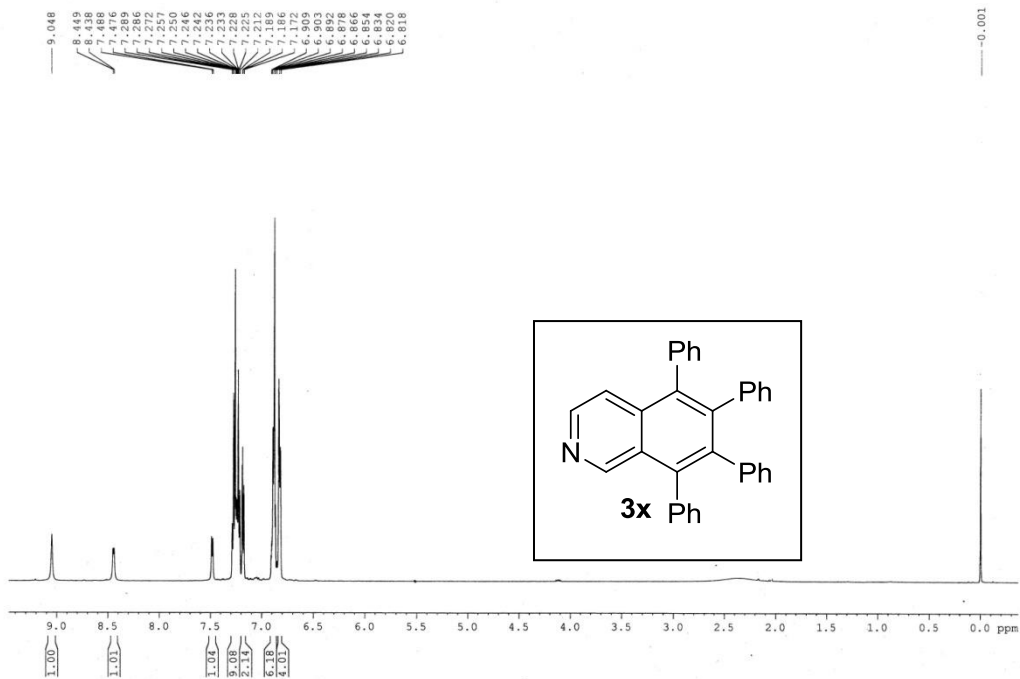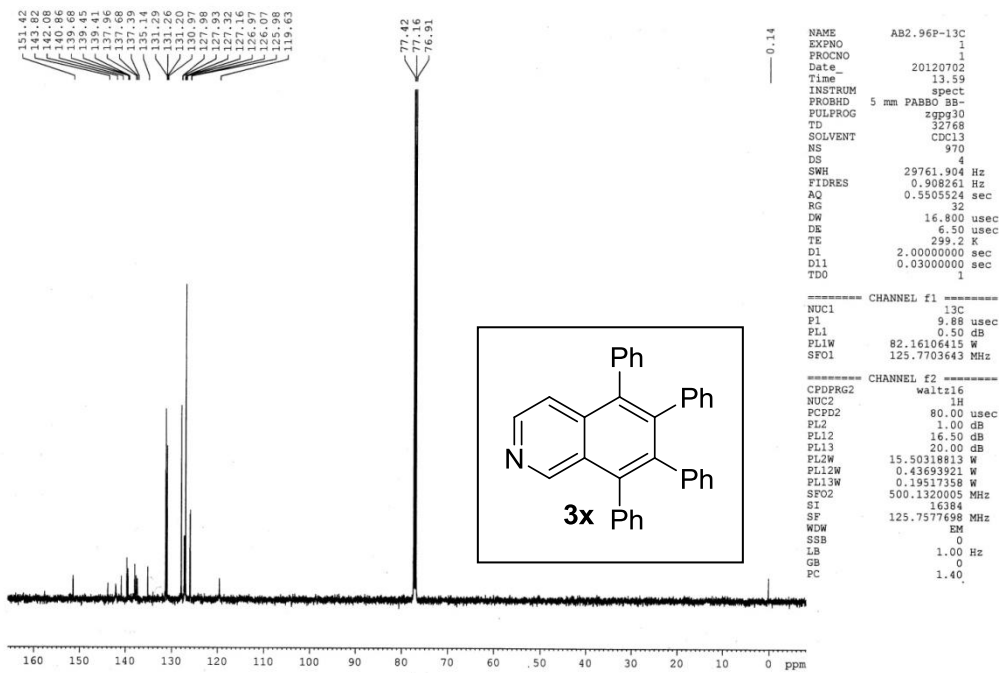

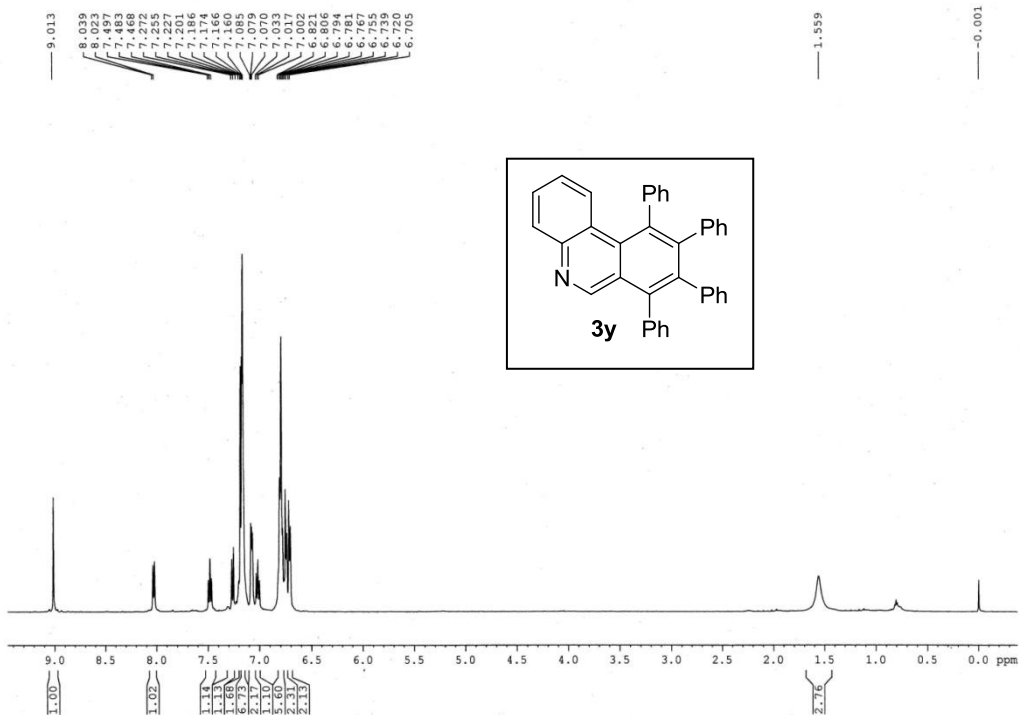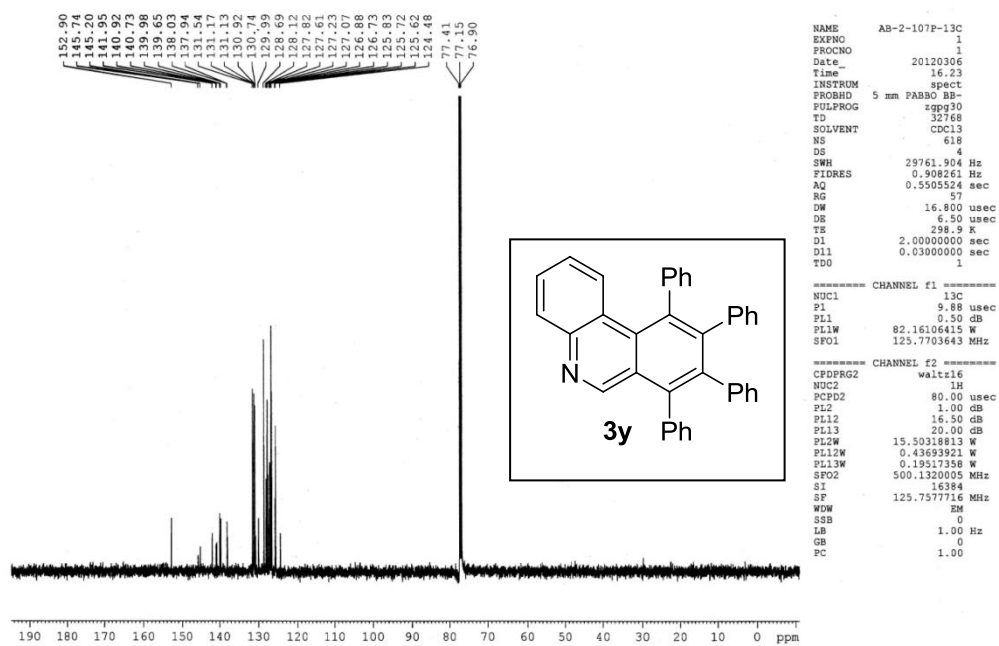

## Crystallographic information:

**Figure 1:** thermal ellipsoid representation of crystal structure of compound **3b**

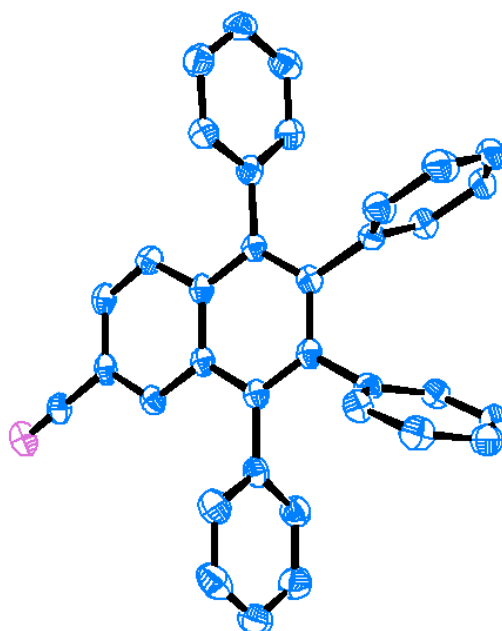

Crystallographic data for compound **3b**.  $C_{35}H_{23}N$ ; Mr = 457.54  $\text{g mol}^{-1}$ , orthorhombic, space group  $P_{bca}$ ,  $a = 6.6655(8) \text{ \AA}$ ,  $b = 21.962(2) \text{ \AA}$ ,  $c = 32.777(4) \text{ \AA}$ ,  $\alpha = 90^\circ$ ,  $\beta = 90^\circ$ ,  $\gamma = 90^\circ$ ,  $V = 4798.2(9) \text{ \AA}^3$ ,  $Z = 8$ ,  $\rho_{\text{calcd.}} = 1.267 \text{ g cm}^{-3}$ ,  $\mu = 0.073 \text{ mm}^{-1}$ ,  $T = 150(2) \text{ K}$ , 4029 observed reflections, 325 refined parameters,  $R_1 = 0.0453$   $wR_2 = 0.1479$  GOF = 1.102.

**Figure 2:** thermal ellipsoid representation of crystal structure of compound **3i**

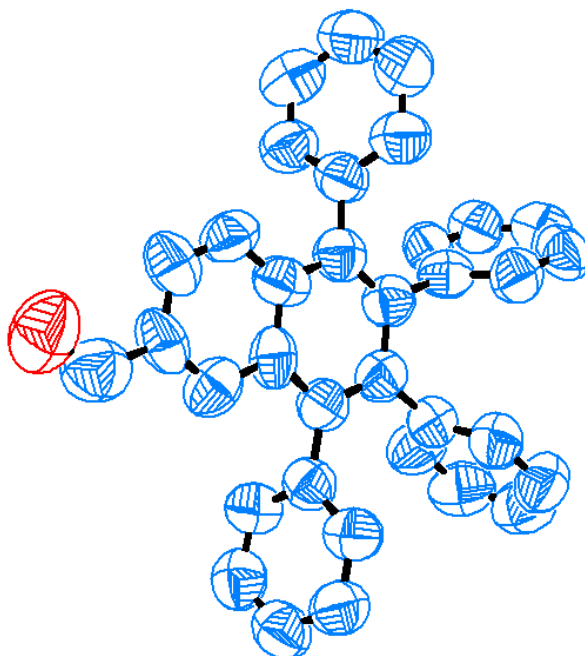

Crystallographic data for compound **3i**.  $C_{35}H_{24}O$ ;  $M_r = 460.54 \text{ g mol}^{-1}$ , orthorhombic, space group  $P2_12_12_1$ ,  $a = 8.242(4)$   $b = 15.900(8)$   $c = 18.948(10)$   $\alpha = 90^\circ$ ,  $\beta = 90^\circ$ ,  $\gamma = 90^\circ$ ,  $V = 2483(2) \text{ \AA}^3$ ,  $Z = 4$ ,  $\rho_{\text{calcd.}} = 1.232 \text{ g cm}^{-3}$ ,  $\mu = 0.072 \text{ mm}^{-1}$ ,  $T = 150(2) \text{ K}$ , 1488 observed reflections, 327 refined parameters,  $R_1 = 0.0468$   $wR_2 = 0.1213$   $\text{GOF} = 0.504$ .

### Isomeric products – some representative NMR data :

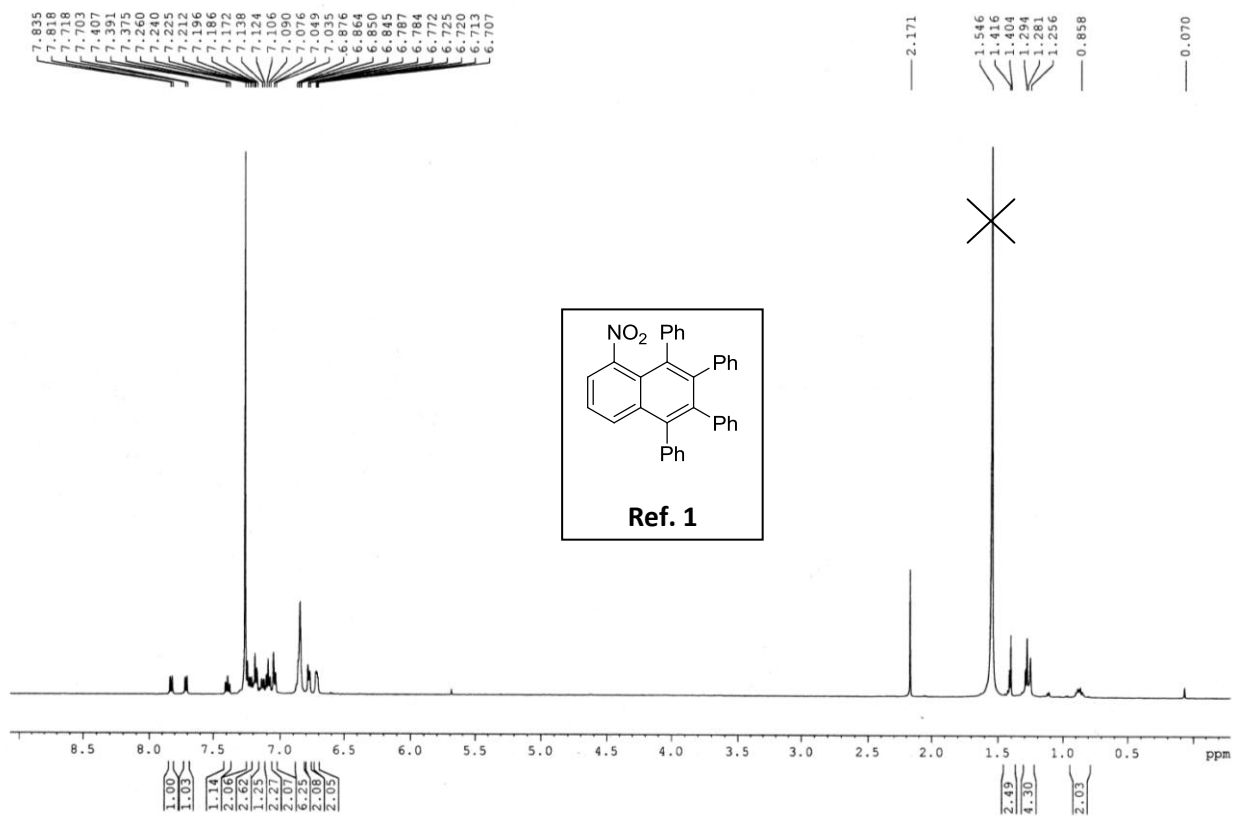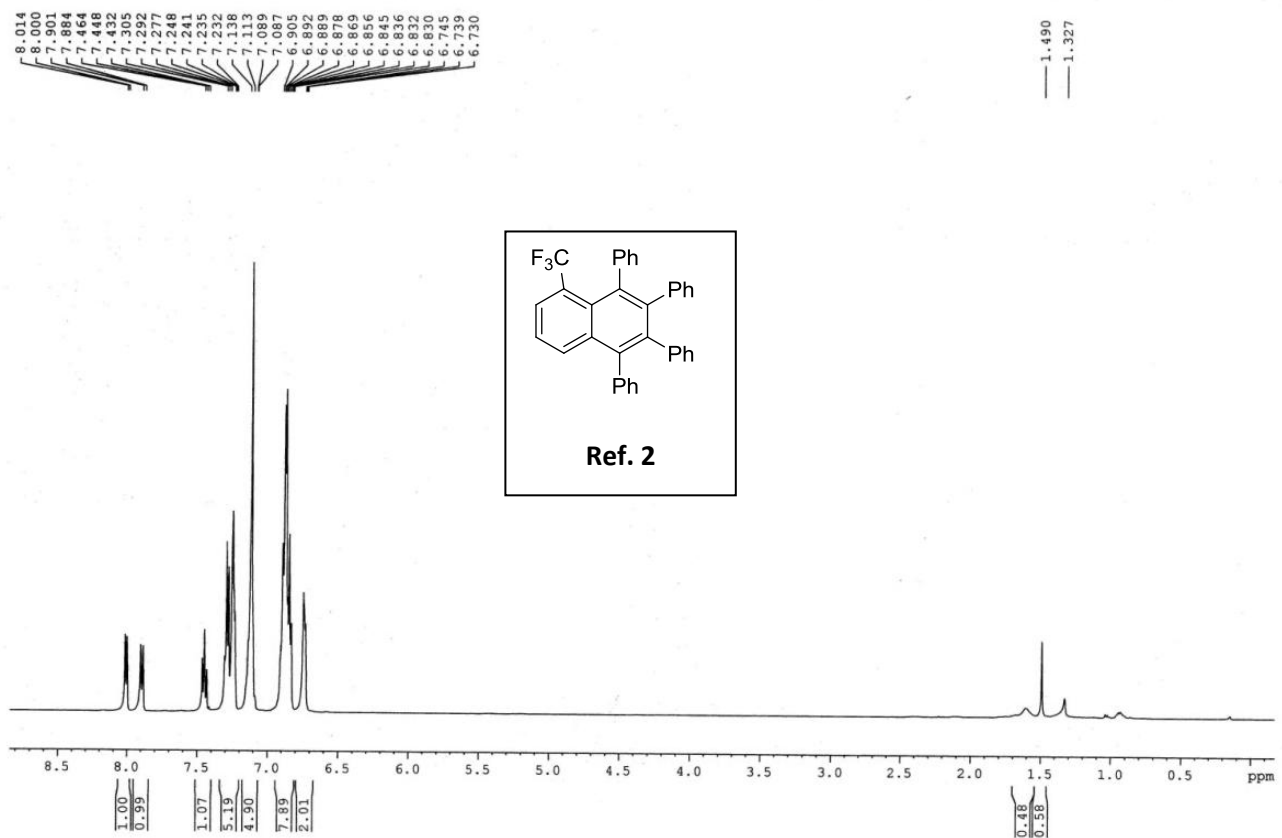

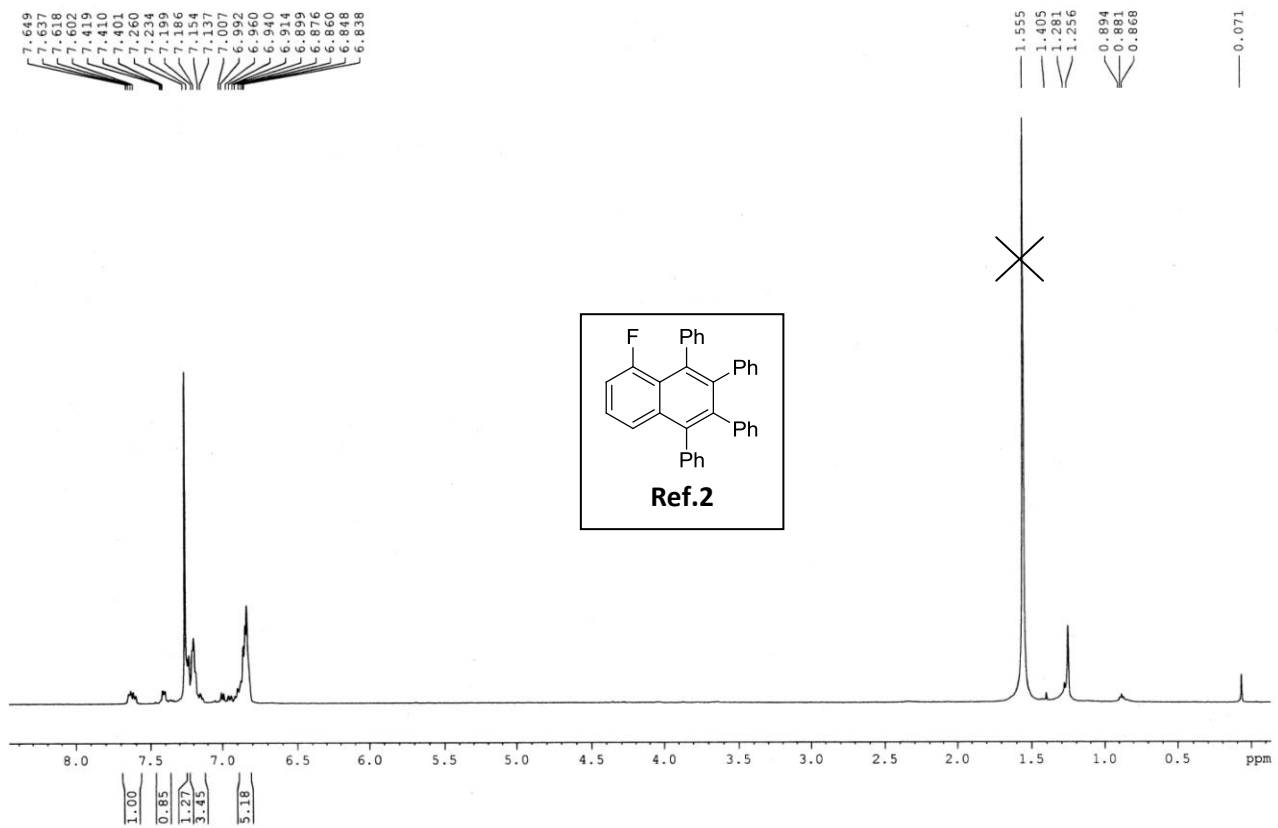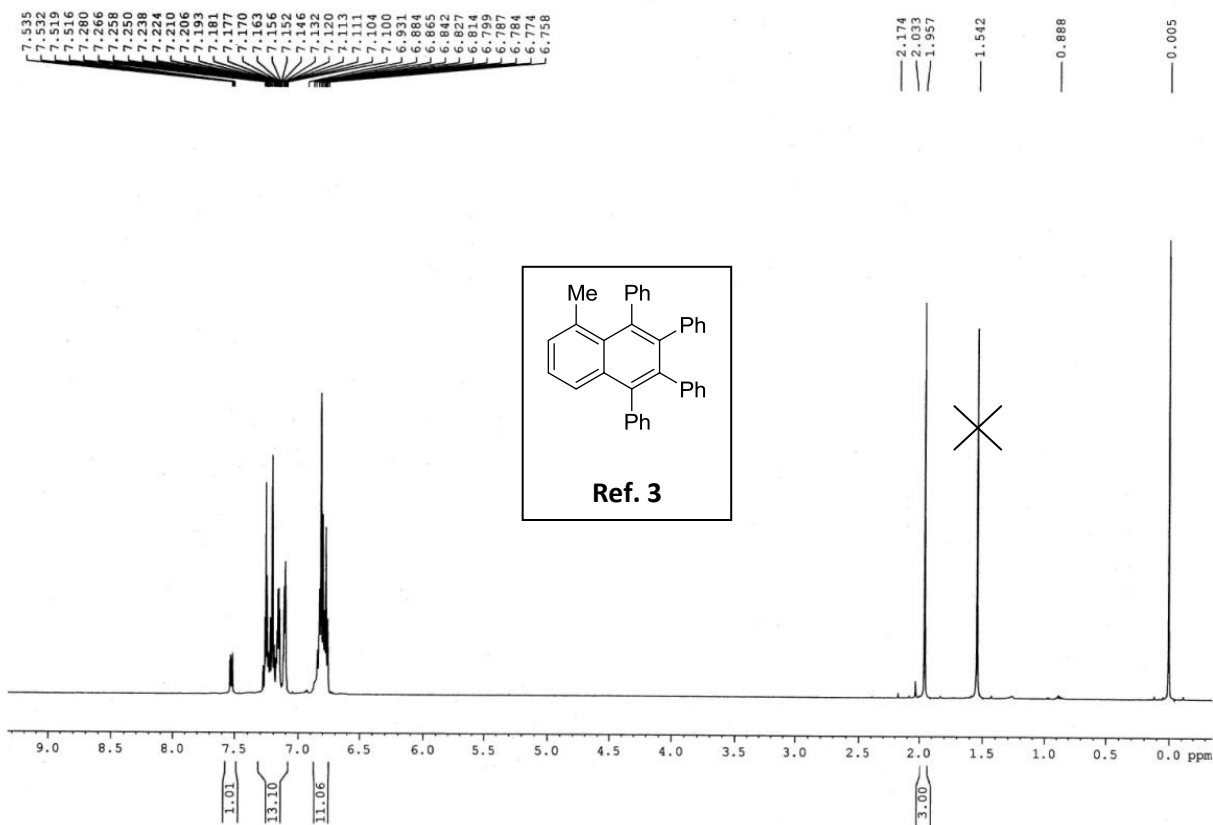



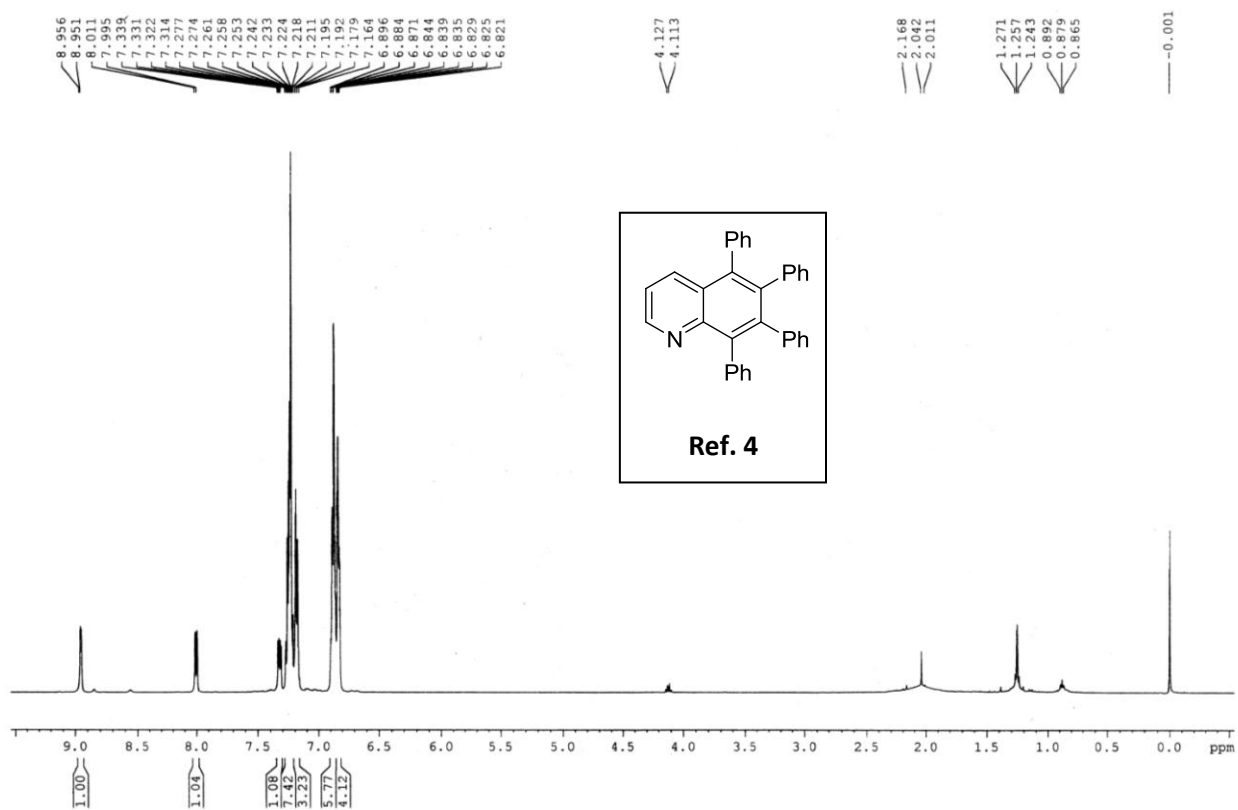

(# X indicates peak due to water in CDCl<sub>3</sub>)

# <sup>1</sup>H-NMR spectrum of Homo-coupling Products :

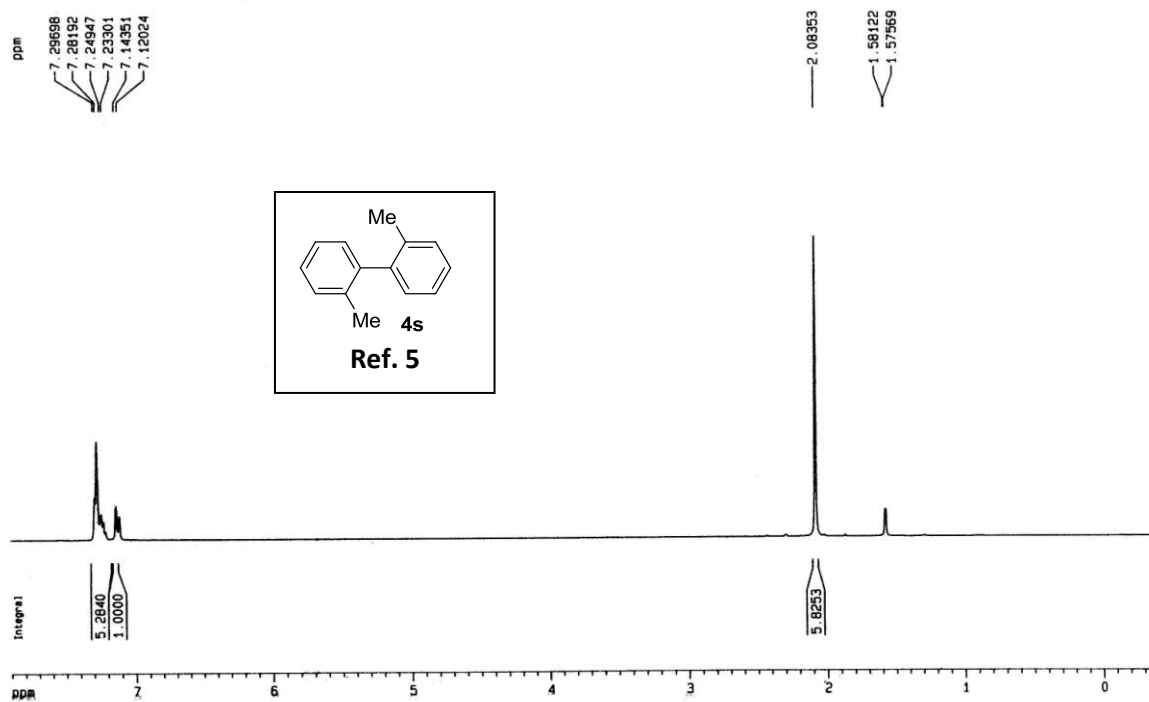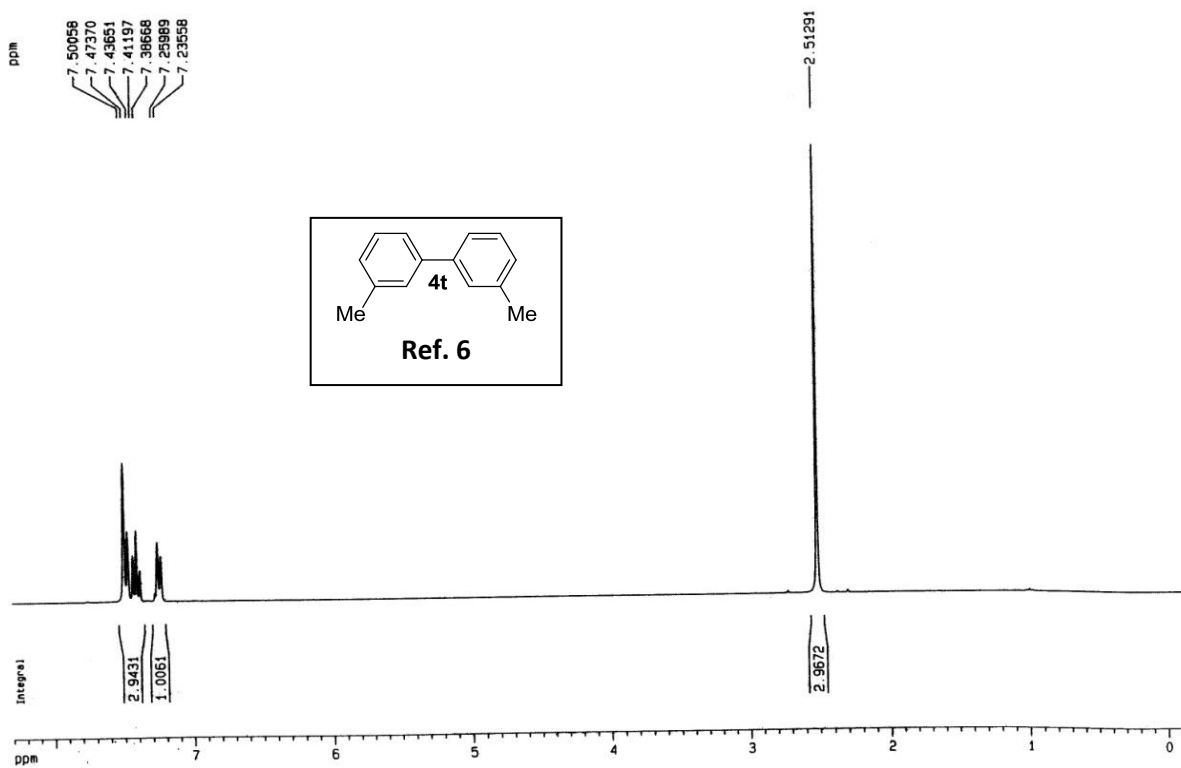

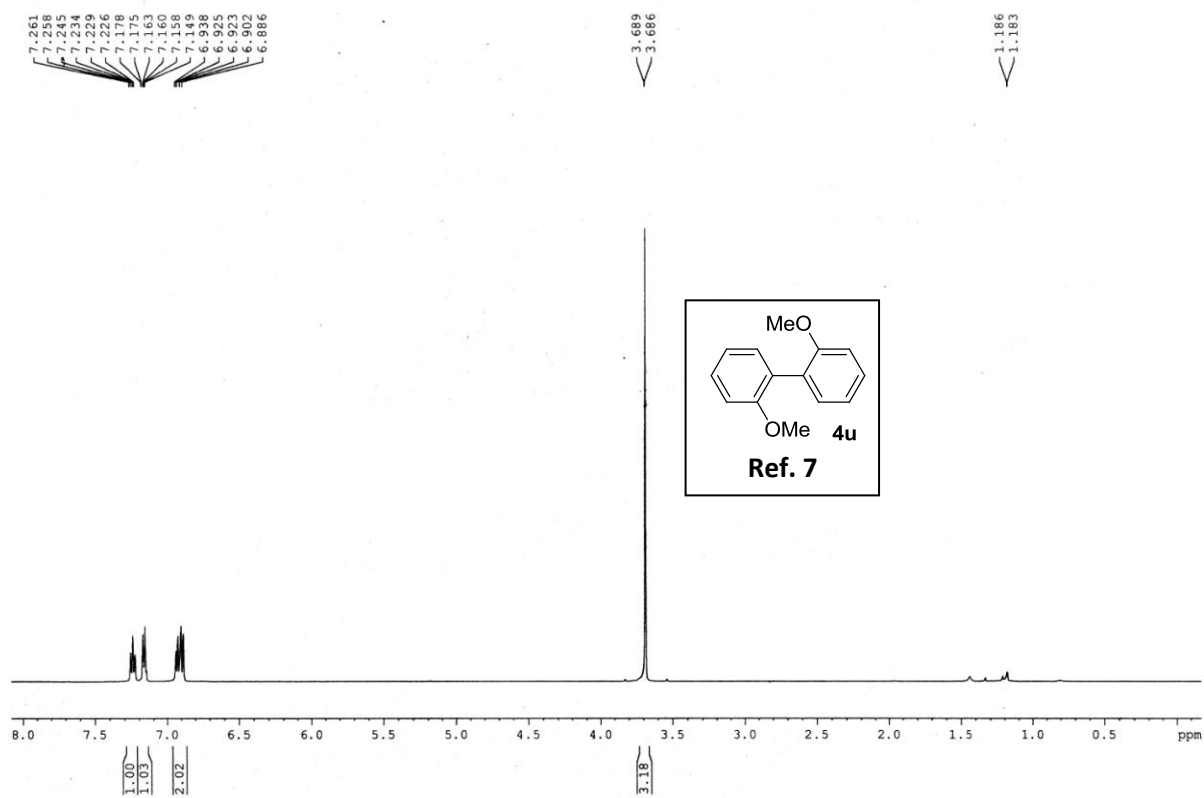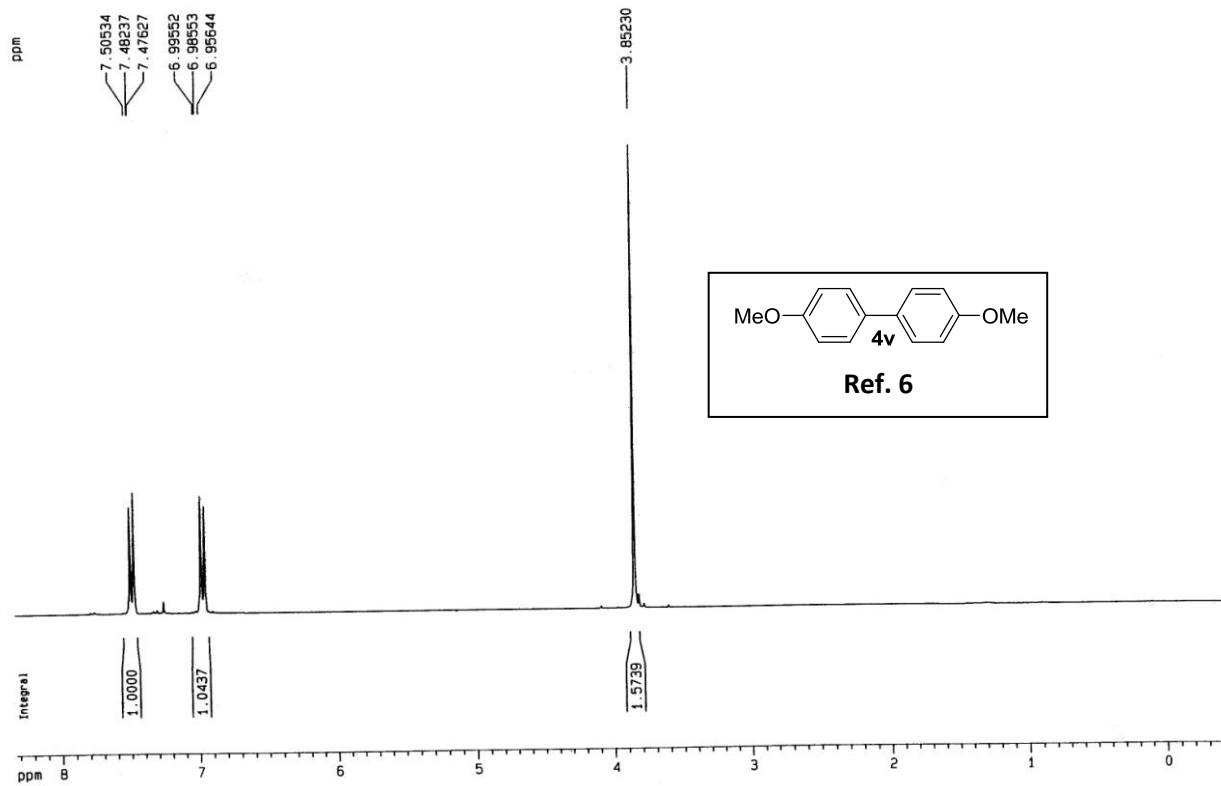

## References:

- Ref. 1.** J. I. G. Cadogan, D. M. Smith and J. B. Thomson, *J. Chem. Soc., Perkin Trans. 1*, 1972, 1296-1304.
- Ref. 2.** B. Baigrie, J. I. G. Cadogan, J. R. Mitchell, A. K. Robertson and J. T. Sharp, *J. Chem. Soc., Perkin Trans. 1*, 1972, 2563-2567.
- Ref. 3.** T. Fukutani, K. Hirano, T. Satoh and M. Miura, *J. Org. Chem.* 2011, **76**, 2867.
- Ref. 4.** T. Takahashi, Y. Li, P. Stepnicka, M. Kitamura, Y. Liu, K. Nakajima and M. Kitora, *J. Am. Chem. Soc.*, 2002, **124**, 576.
- Ref. 5.** Y. Yuan and Y. Bian, *Appl. Organomet. Chem.* 2008, **22**, 15.
- Ref. 6.** D. Srimani, A. Bej and A. Sarkar, *J. Org. Chem.* 2010, **75**, 4296.
- Ref. 7.** C. F. Nising, U. K. Schmid, M. Nieger and S. Bräse, *J. Org. Chem.* 2004, **69**, 6830.
